# Supplementary material for: Impacts of crop type, management and soil quality indicators on background nitrous oxide emissions (BNE) from Chinese croplands: a quantitative review and analysis
Source: Royal Society of Chemistry journal article supplement (doi:10.1039/d2ea00033d), 2022-01-01
Supplement: d2ea00033d2.pdf [file d2ea00033d2.pdf]

Table 2: Statistically significant relationships ( $p < 0.05$ ) represented by maximal information coefficient (MIC) and measure of the non-linearity of the relationship (MIC-R<sup>2</sup>) values between annual background nitrous oxide emissions (BNE) and environmental parameters for the cereal, rice and vegetable crops. MIC captures relationship strength, and the higher MIC-R<sup>2</sup> is, the more non-linear the relationship is. N is the number of studies.

| Parameters            | Cereal |                    |     | Rice |                    |    | Vegetable |                    |    |
|-----------------------|--------|--------------------|-----|------|--------------------|----|-----------|--------------------|----|
|                       | MIC    | MIC-R <sup>2</sup> | N   | MIC  | MIC-R <sup>2</sup> | N  | MIC       | MIC-R <sup>2</sup> | N  |
| Air temperature       | 0.48   | 0.37               | 167 |      |                    |    |           |                    |    |
| pH                    | 0.37   | 0.19               | 195 |      |                    |    | 0.50      | -0.39              | 59 |
| BD                    | 0.33   | 0.30               | 176 | 0.40 | 0.37               | 68 | 0.50      | 0.34               | 56 |
| Silt content          | 0.42   | 0.26               | 115 |      |                    |    |           |                    |    |
| Sand content          | 0.39   | 0.38               | 116 |      |                    |    |           |                    |    |
| Clay content          | 0.30   | 0.19               | 176 |      |                    |    |           |                    |    |
| Soil C                | 0.32   | 0.07               | 192 | 0.40 | 0.23               | 81 |           |                    |    |
| Soil N                | 0.38   | 0.18               | 161 |      |                    |    |           |                    |    |
| Previous N fertilizer | 0.31   | 0.29               | 163 |      |                    |    | 0.59      | 0.51               | 54 |
| Crop yield            | 0.47   | 0.31               | 94  |      |                    |    | 0.59      | 0.18               | 19 |
| Study length          | 0.61   | 0.58               | 197 | 0.39 | -0.02              | 78 |           |                    |    |
| Chamber size          | 0.34   | 0.10               | 152 |      |                    |    | 0.50      | -0.39              | 43 |
