# Supplementary material for: Impacts of crop type, management and soil quality indicators on background nitrous oxide emissions (BNE) from Chinese croplands: a quantitative review and analysis
Source: Royal Society of Chemistry journal article supplement (doi:10.1039/d2ea00033d), 2022-01-01
Supplement: d2ea00033d3.pdf [file d2ea00033d3.pdf]

Table S1: Published studies on background N<sub>2</sub>O emissions from Chinese croplands

| Reference           | Lat  | Lon   | MAP  | MAT  | Sand | Clay | Silt | Texture         | Soil C | Soil N | pH  | BD   | Crop        | Crop type  | Previous N fertilizer    | Duration | Replicate | Cum N <sub>2</sub> O-N | Crop DM yield         |
|---------------------|------|-------|------|------|------|------|------|-----------------|--------|--------|-----|------|-------------|------------|--------------------------|----------|-----------|------------------------|-----------------------|
|                     | (°)  | (°)   | (mm) | (°C) | (%)  | (%)  | (%)  |                 |        |        |     |      |             |            | (kg N ha <sup>-1</sup> ) | (days)   | (n)       | (g ha <sup>-1</sup> )  | (t ha <sup>-1</sup> ) |
| Ahmad et al. (2009) | 29.9 | 115.5 | 1360 | 16.8 | -    | -    | -    | Silty clay loam | 1.83   | 0.36   | 6.6 | 1.26 | Rice        | Rice       | 252                      | 128      | 3         | 750                    | -                     |
| Ahmad et al. (2009) | 29.9 | 115.5 | 1360 | 16.8 | -    | -    | -    | Silty clay loam | 1.83   | 0.36   | 6.6 | 1.26 | Rice        | Rice       | 252                      | 128      | 3         | 590                    | -                     |
| Cai et al. (2011)   | 35.0 | 114.4 | 615  | 13.9 | 51   | 14   | 35   | Loam            | 0.38   | 0.04   | 8.5 | 1.39 | Maize       | Cereals    | 150                      | 99       | 4         | 400                    | 0.8                   |
| Cai et al. (2011)   | 35.0 | 114.4 | 615  | 13.9 | 51   | 14   | 35   | Loam            | 0.38   | 0.04   | 8.5 | 1.39 | Wheat       | Cereals    | 150                      | 247      | 4         | 110                    | 0.6                   |
| Cai et al. (2011)   | 35.0 | 114.4 | 615  | 13.9 | 51   | 14   | 35   | Loam            | 0.38   | 0.04   | 8.5 | 1.39 | Maize       | Cereals    | 150                      | 143      | 4         | 80                     | 0.8                   |
| Cai et al. (2011)   | 35.0 | 114.4 | 615  | 13.9 | 51   | 14   | 35   | Loam            | 0.38   | 0.04   | 8.5 | 1.39 | Wheat       | Cereals    | 150                      | 222      | 4         | 40                     | 0.6                   |
| Cai et al. (2011)   | 35.0 | 114.4 | 615  | 13.9 | 51   | 14   | 35   | Loam            | 0.38   | 0.04   | 8.5 | 1.39 | Maize       | Cereals    | 150                      | 143      | 4         | 190                    | 0.8                   |
| Cai et al. (2011)   | 35.0 | 114.4 | 615  | 13.9 | 51   | 14   | 35   | Loam            | 0.38   | 0.04   | 8.5 | 1.39 | Wheat       | Cereals    | 150                      | 224      | 4         | 80                     | 0.6                   |
| Cai et al. (2013)   | 35.0 | 114.4 | 615  | 13.9 | 51   | 14   | 35   | Loam            | 0.38   | 0.04   | 8.5 | 1.39 | Wheat-maize | Cereals    | 300                      | 365      | 4         | 510                    | 1.4                   |
| Cai et al. (2013)   | 35.0 | 114.4 | 615  | 13.9 | 54   | 16   | 30   | Sandy loam      | 0.38   | 0.07   | 8.4 | 1.43 | Wheat-maize | Cereals    | 300                      | 365      | 4         | 1640                   | 12.7                  |
| Cai et al. (2013)   | 35.0 | 114.4 | 615  | 13.9 | 54   | 16   | 30   | Sandy loam      | 0.38   | 0.07   | 8.4 | 1.43 | Wheat-maize | Cereals    | 300                      | 365      | 4         | 1420                   | 12.7                  |
| Cai et al. (2012)   | 35.0 | 114.4 | 615  | 13.9 | 53   | 15   | 32   | Sandy loam      | 0.38   | 0.11   | 8.3 | 1.35 | Maize       | Cereals    | 300                      | 104      | 4         | 920                    | 9.8                   |
| Cui et al. (2012)   | 37.0 | 118.0 | 586  | 13.0 | 17   | 17   | 66   | Silt loam       | 1.77   | 0.11   | 8.3 | 1.42 | Maize       | Cereals    | 300                      | 244      | 5         | 200                    | -                     |
| Cui et al. (2012)   | 37.0 | 118.0 | 586  | 13.0 | 17   | 17   | 66   | Silt loam       | 1.77   | 0.11   | 8.3 | 1.42 | Wheat       | Cereals    | 300                      | 113      | 5         | 300                    | -                     |
| Diao et al. (2013)  | 39.5 | 116.4 | 507  | 11.5 | 58   | 8    | 34   | Sandy loam      | 1.69   | 0.07   | 8.2 | -    | Cucumber    | Vegetables | 518                      | 96       | 4         | 430                    | -                     |
| Diao et al. (2013)  | 39.5 | 116.4 | 507  | 11.5 | 58   | 8    | 34   | Sandy loam      | 1.69   | 0.07   | 8.2 | -    | Cabbage     | Vegetables | 472                      | 123      | 4         | 410                    | -                     |
| Ding et al. (2007)  | 35.0 | 114.4 | 615  | 13.9 | 17   | 11   | 72   | Silt loam       | 0.73   | 0.06   | 8.7 | 1.35 | Maize       | Cereals    | 200                      | 105      | 4         | 440                    | -                     |
| Ding et al. (2007)  | 35.0 | 114.4 | 615  | 13.9 | 17   | 11   | 72   | Silt loam       | 0.73   | 0.06   | 8.7 | 1.35 | Wheat       | Cereals    | 200                      | 241      | 4         | 160                    | -                     |
| Ding et al. (2011)  | 35.0 | 114.4 | 615  | 13.9 | 17   | 11   | 72   | Silt loam       | 0.73   | 0.04   | 8.4 | 1.40 | Maize       | Cereals    | 150                      | 112      | 4         | 110                    | -                     |
| Ding et al. (2011)  | 35.0 | 114.4 | 615  | 13.9 | 17   | 11   | 72   | Silt loam       | 0.73   | 0.04   | 8.4 | 1.40 | Maize       | Cereals    | 150                      | 112      | 4         | 110                    | -                     |
| Ding et al. (2011)  | 35.0 | 114.4 | 615  | 13.9 | 17   | 11   | 72   | Silt loam       | 0.73   | 0.04   | 8.4 | 1.40 | Maize       | Cereals    | 150                      | 112      | 4         | 250                    | -                     |
| Ding et al. (2011)  | 35.0 | 114.4 | 615  | 13.9 | 17   | 11   | 72   | Silt loam       | 0.73   | 0.04   | 8.4 | 1.40 | Maize       | Cereals    | 150                      | 112      | 4         | 160                    | -                     |
| Ding et al. (2011)  | 35.0 | 114.4 | 615  | 13.9 | 17   | 11   | 72   | Silt loam       | 0.73   | 0.04   | 8.4 | 1.40 | Maize       | Cereals    | 150                      | 112      | 4         | 180                    | -                     |
| Ding et al. (2011)  | 35.0 | 114.4 | 615  | 13.9 | 17   | 11   | 72   | Silt loam       | 0.73   | 0.04   | 8.4 | 1.40 | Maize       | Cereals    | 150                      | 112      | 4         | 160                    | -                     |
| Ding et al. (2013)  | 35.0 | 114.4 | 615  | 13.9 | 17   | 11   | 72   | Silt loam       | 0.73   | 0.04   | 8.4 | 1.40 | Wheat       | Cereals    | 150                      | 233      | 4         | 100                    | -                     |
| Ding et al. (2013)  | 35.0 | 114.4 | 615  | 13.9 | 17   | 11   | 72   | Silt loam       | 0.73   | 0.04   | 8.4 | 1.40 | Wheat       | Cereals    | 150                      | 233      | 4         | 100                    | -                     |
| Ding et al. (2013)  | 35.0 | 114.4 | 615  | 13.9 | 17   | 11   | 72   | Silt loam       | 0.73   | 0.04   | 8.4 | 1.40 | Wheat       | Cereals    | 150                      | 233      | 4         | 180                    | -                     |
| Ding et al. (2013)  | 35.0 | 114.4 | 615  | 13.9 | 17   | 11   | 72   | Silt loam       | 0.73   | 0.04   | 8.4 | 1.40 | Wheat       | Cereals    | 150                      | 233      | 4         | 190                    | -                     |
| Ding et al. (2013)  | 35.0 | 114.4 | 615  | 13.9 | 17   | 11   | 72   | Silt loam       | 0.73   | 0.04   | 8.4 | 1.40 | Wheat       | Cereals    | 150                      | 233      | 4         | 180                    | -                     |
| Ding et al. (2013)  | 35.0 | 114.4 | 615  | 13.9 | 17   | 11   | 72   | Silt loam       | 0.73   | 0.04   | 8.4 | 1.40 | Wheat       | Cereals    | 150                      | 233      | 4         | 150                    | -                     |
| Fu et al. (2015)    | 28.1 | 113.2 | 1500 | 17.1 | -    | -    | -    | Clay loam       | 1.54   | 0.16   | 6.1 | 1.28 | Rice        | Rice       | 120                      | 79       | 4         | 580                    | -                     |
| Fu et al. (2015)    | 28.1 | 113.2 | 1500 | 17.1 | -    | -    | -    | Clay loam       | 1.54   | 0.16   | 6.1 | 1.28 | Rice        | Rice       | 120                      | 79       | 4         | 620                    | -                     |
| Fu et al. (2015)    | 28.1 | 113.2 | 1500 | 17.1 | -    | -    | -    | Clay loam       | 1.54   | 0.16   | 6.1 | 1.28 | Rice        | Rice       | 135                      | 92       | 4         | 320                    | -                     |
| Fu et al. (2015)    | 28.1 | 113.2 | 1500 | 17.1 | -    | -    | -    | Clay loam       | 1.54   | 0.16   | 6.1 | 1.28 | Rice        | Rice       | 135                      | 92       | 4         | 540                    | -                     |
| Hao et al. (2012)   | 39.1 | 117.0 | 586  | 11.6 | -    | -    | -    | Loam            | 1.47   | -      | -   | 1.28 | Celery      | Vegetables | 675                      | 140      | 4         | 310                    | -                     |
| Hao et al. (2012)   | 39.1 | 117.0 | 586  | 11.6 | -    | -    | -    | Loam            | 1.47   | -      | -   | 1.28 | Tomato      | Vegetables | 675                      | 120      | 4         | 550                    | -                     |
| Hu et al. (2013)    | 36.9 | 115.2 | 556  | 13.1 | 35   | 13   | 52   | Silt loam       | 0.85   | 0.09   | 8.2 | 1.34 | Maize       | Cereals    | 279                      | 117      | 4         | 600                    | 9.1                   |
| Hu et al. (2013)    | 36.9 | 115.2 | 556  | 13.1 | 35   | 13   | 52   | Silt loam       | 0.85   | 0.09   | 8.2 | 1.34 | Wheat       | Cereals    | 935                      | 254      | 4         | 240                    | 3.3                   |
| Hu et al. (2013)    | 36.9 | 115.2 | 556  | 13.1 | 35   | 13   | 52   | Silt loam       | 0.85   | 0.09   | 8.2 | 1.34 | Maize       | Cereals    | 195                      | 106      | 4         | 350                    | 9.0                   |

|                     |      |       |      |      |    |    |    |                 |      |      |     |      |                      |            |     |     |   |      |      |
|---------------------|------|-------|------|------|----|----|----|-----------------|------|------|-----|------|----------------------|------------|-----|-----|---|------|------|
| Hu et al. (2013)    | 36.9 | 115.2 | 556  | 13.1 | 35 | 13 | 52 | Silt loam       | 0.85 | 0.09 | 8.2 | 1.34 | Wheat                | Cereals    | 416 | 254 | 4 | 200  | 2.5  |
| Hu et al. (2013)    | 36.9 | 115.2 | 556  | 13.1 | 42 | 12 | 46 | Loam            | 0.85 | 0.13 | 8.2 | 1.34 | Maize                | Cereals    | 377 | 160 | 4 | 600  | 9.1  |
| Hu et al. (2013)    | 36.9 | 115.2 | 556  | 13.1 | 42 | 12 | 46 | Loam            | 0.85 | 0.13 | 8.2 | 1.34 | Wheat                | Cereals    | 288 | 211 | 4 | 240  | 3.3  |
| Hu et al. (2013)    | 31.6 | 120.7 | 1038 | 15.5 | 29 | 31 | 41 | Clay loam       | 2.22 | 0.22 | 7.6 | 1.20 | Rice                 | Rice       | 210 | -   | 4 | 40   | 7.4  |
| Hu et al. (2013)    | 35.2 | 107.7 | 584  | 9.1  | -  | -  | -  | Loam            | 1.74 | 0.10 | 8.0 | 1.30 | Maize                | Cereals    | 549 | 165 | 4 | 310  | -    |
| Ji et al. (2012)    | 32.0 | 119.3 | 1297 | 15.1 | 17 | 14 | 69 | Silt loam       | 1.10 | 0.17 | 6.9 | 1.31 | Wheat                | Cereals    | 150 | 209 | 4 | 950  | 2.9  |
| Ji et al. (2012)    | 32.0 | 119.3 | 1297 | 15.1 | 17 | 14 | 69 | Silt loam       | 1.10 | 0.17 | 6.9 | 1.31 | Wheat                | Cereals    | 185 | 206 | 4 | 350  | 3.2  |
| Ji et al. (2013)    | 32.0 | 119.3 | 1019 | 15.1 | 17 | 14 | 69 | Silt loam       | 1.10 | 0.17 | 6.9 | 1.31 | Rice                 | Rice       | 240 | 132 | 4 | 100  | 6.6  |
| Ji et al. (2013)    | 32.0 | 119.3 | 1019 | 15.1 | 17 | 14 | 69 | Silt loam       | 1.10 | 0.17 | 6.9 | 1.31 | Rice                 | Rice       | 240 | 132 | 4 | 90   | 6.2  |
| Ji et al. (2013)    | 32.0 | 119.3 | 1019 | 15.1 | 17 | 14 | 69 | Silt loam       | 1.10 | 0.17 | 6.9 | 1.31 | Rice                 | Rice       | 240 | 129 | 4 | 420  | 6.5  |
| Ji et al. (2013)    | 32.0 | 119.3 | 1019 | 15.1 | 17 | 14 | 69 | Silt loam       | 1.10 | 0.17 | 6.9 | 1.31 | Rice                 | Rice       | 240 | 155 | 4 | 150  | 7.0  |
| Jiang et al. (2010) | 32.0 | 118.8 | 1256 | 16.0 | 4  | 51 | 45 | Silty clay      | 1.31 | 0.11 | 6.7 | 1.15 | Wheat                | Cereals    | 250 | 180 | 3 | 140  | -    |
| Jiang et al. (2010) | 32.0 | 118.8 | 1256 | 16.0 | 4  | 51 | 45 | Silty clay      | 1.31 | 0.11 | 6.7 | 1.15 | Maize                | Cereals    | 300 | 81  | 3 | 0    | -    |
| Jiang et al. (2010) | 32.0 | 118.8 | 1256 | 16.0 | 4  | 51 | 45 | Silty clay      | 1.31 | 0.11 | 6.7 | 1.15 | Maize                | Cereals    | 300 | 78  | 3 | 520  | -    |
| Li et al. (2013)    | 47.4 | 126.6 | 550  | 1.5  | -  | -  | -  | Clay loam       | 2.86 | 0.21 | 5.9 | 1.00 | Maize                | Cereals    | 469 | 142 | 4 | 640  | -    |
| Lin et al. (2011)   | 29.6 | 139.6 | 1577 | 16.8 | -  | -  | -  | Clay Loam       | 2.48 | 0.27 | 5.1 | 1.35 | Rape                 | Vegetables | 150 | 330 | 4 | 160  | -    |
| Liu et al. (2011)   | 34.9 | 110.7 | 559  | 14.7 | 29 | 32 | 39 | Clay loam       | 1.13 | 0.11 | 8.7 | 1.17 | Wheat-maize          | Cereals    | 493 | 361 | 4 | 1500 | 11.2 |
| Liu et al. (2014)   | 34.9 | 110.7 | 562  | 14.8 | 17 | 38 | 46 | Silty clay loam | -    | 0.11 | 8.0 | 1.20 | Maize                | Cereals    | 120 | -   | 4 | 900  | 6.1  |
| Liu et al. (2014)   | 34.9 | 110.7 | 562  | 14.8 | 17 | 38 | 46 | Silty clay loam | -    | 0.11 | 8.0 | 1.20 | Maize                | Cereals    | 210 | -   | 4 | 390  | 5.3  |
| Liu et al. (2014)   | 34.9 | 110.7 | 562  | 14.8 | 17 | 38 | 46 | Silty clay loam | -    | 0.11 | 8.0 | 1.20 | Maize                | Cereals    | 250 | -   | 4 | 1010 | 4.9  |
| Liu et al. (2014)   | 34.9 | 110.7 | 562  | 14.8 | 17 | 38 | 46 | Silty clay loam | -    | 0.11 | 8.0 | 1.20 | Wheat                | Cereals    | 180 | -   | 4 | 1320 | 4.6  |
| Liu et al. (2014)   | 34.9 | 110.7 | 562  | 14.8 | 17 | 38 | 46 | Silty clay loam | -    | 0.11 | 8.0 | 1.20 | Wheat                | Cereals    | 180 | -   | 4 | 950  | 4.4  |
| Liu et al. (2014)   | 34.9 | 110.7 | 562  | 14.8 | 17 | 38 | 46 | Silty clay loam | -    | 0.11 | 8.0 | 1.20 | Wheat                | Cereals    | 180 | -   | 4 | 480  | 5.7  |
| Liu et al. (2010)   | 31.9 | 118.8 | 1250 | 15.9 | 6  | 54 | 40 | Silty clay      | -    | 0.15 | 6.5 | 1.24 | Rice                 | Rice       | 200 | -   | 5 | 30   | -    |
| Liu et al. (2010)   | 31.9 | 118.8 | 1250 | 15.9 | 6  | 54 | 40 | Silty clay      | -    | 0.15 | 6.5 | 1.24 | Rice                 | Rice       | 200 | -   | 5 | 600  | -    |
| Liu et al. (2010)   | 31.9 | 118.8 | 1250 | 15.9 | 6  | 54 | 40 | Silty clay      | -    | 0.15 | 6.5 | 1.24 | Rice                 | Rice       | 200 | -   | 5 | 760  | -    |
| Liu et al. (2010)   | 31.9 | 118.8 | 1250 | 15.9 | 6  | 54 | 40 | Silty clay      | -    | 0.15 | 6.5 | 1.24 | Wheat                | Cereals    | 163 | -   | 5 | 1200 | -    |
| Liu et al. (2010)   | 31.9 | 118.8 | 1250 | 15.9 | 6  | 54 | 40 | Silty clay      | -    | 0.15 | 6.5 | 1.24 | Wheat                | Cereals    | 163 | -   | 5 | 1510 | -    |
| Liu et al. (2010)   | 31.9 | 118.8 | 1250 | 15.9 | 6  | 54 | 40 | Silty clay      | -    | 0.15 | 6.5 | 1.24 | Wheat                | Cereals    | 163 | -   | 5 | 960  | -    |
| Liu et al. (2011)   | 37.6 | 112.9 | 430  | 9.3  | 29 | 39 | 32 | Clay loam       | -    | 0.18 | 7.5 | 1.33 | Maize                | Cereals    | 225 | 130 | - | 180  | 8.4  |
| Liu et al. (2012)   | 31.1 | 104.2 | 807  | 16.5 | 52 | 16 | 32 | Loam            | 2.01 | 0.18 | 6.0 | -    | Rice                 | Rice       | 297 | 106 | 4 | 110  | 8.4  |
| Liu et al. (2012)   | 28.1 | 113.2 | 1500 | 17.1 | 54 | 18 | 28 | Sandy loam      | 1.88 | 0.18 | 6.2 | -    | Rice                 | Rice       | 297 | 106 | 4 | 230  | 6.4  |
| Liu et al. (2012)   | 28.3 | 116.3 | 1400 | 17.7 | 42 | 20 | 38 | Loam            | 1.77 | 0.16 | 4.9 | -    | Rice                 | Rice       | 297 | 106 | 4 | 90   | 6.7  |
| Liu et al. (2013)   | 41.1 | 121.3 | 258  | 5.2  | -  | -  | -  | Loam            | 1.32 | 0.14 | 7.1 | -    | Maize                | Cereals    | 237 | 147 | - | 1280 | 10.3 |
| Liu et al. (2013)   | 41.1 | 121.3 | 976  | 8.3  | -  | -  | -  | Loam            | 1.32 | 0.14 | 7.1 | -    | Maize                | Cereals    | 237 | 147 | - | 630  | 8.8  |
| Liu et al. (2013)   | 41.1 | 121.3 | 447  | 8.7  | -  | -  | -  | Loam            | 1.32 | 0.14 | 7.1 | -    | Maize                | Cereals    | 237 | 147 | - | 540  | 8.7  |
| Liu et al. (2013)   | 31.3 | 105.5 | 836  | 17.3 | 35 | 7  | 59 | Silt loam       | 0.51 | 0.08 | 8.2 | 1.34 | Wheat                | Cereals    | 130 | 188 | - | 40   | 1.3  |
| Liu et al. (2013)   | 31.3 | 105.5 | 836  | 17.3 | 35 | 7  | 59 | Silt loam       | 0.51 | 0.08 | 8.2 | 1.34 | Maize                | Cereals    | 150 | 101 | - | 80   | 1.9  |
| Lu et al. (2015)    | 26.7 | 115.1 | 1590 | 18.0 | 58 | 11 | 31 | Sandy loam      | 0.94 | 0.10 | 5.0 | 1.30 | Early-rice+late-rice | Rice       | 365 | 363 | 5 | 1430 | -    |
| Lu et al. (2015)    | 24.7 | 102.7 | 785  | 14.9 | -  | -  | -  | Clay loam       | 1.79 | 0.21 | 7.1 | 1.29 | Celery               | Vegetables | 825 | 95  | 4 | 1950 | -    |
| Ma et al. (2014)    | 24.7 | 102.7 | 785  | 14.9 | -  | -  | -  | Sandy loam      | 1.68 | 0.17 | 6.9 | 1.29 | Celery               | Vegetables | 825 | 99  | 4 | 2340 | -    |
| Ma et al. (2014)    | 31.6 | 120.7 | 1288 | 16.4 | -  | -  | -  | Silty clay      | 2.03 | 0.21 | 7.4 | 1.11 | Wheat                | Cereals    | 240 | 199 | 4 | 570  | 1.8  |
| Ma et al. (2014)    | 31.6 | 120.7 | 1288 | 16.4 | -  | -  | -  | Silty clay      | 2.03 | 0.21 | 7.4 | 1.11 | Wheat                | Cereals    | 240 | 199 | 4 | 620  | 1.7  |
| Ma et al. (2014)    | 29.8 | 106.4 | 1223 | 18.4 | 7  | 53 | 40 | Silty clay      | 0.88 | 0.15 | 5.6 | 1.29 | Cabbage              | Vegetables | 232 | 117 | 3 | 800  | -    |

|                     |      |       |      |      |    |    |    |                 |      |      |     |      |             |            |     |     |   |      |       |
|---------------------|------|-------|------|------|----|----|----|-----------------|------|------|-----|------|-------------|------------|-----|-----|---|------|-------|
| Ma et al. (2014)    | 29.8 | 106.4 | 1223 | 18.4 | 7  | 53 | 40 | Silty clay      | 0.88 | 0.15 | 5.6 | 1.29 | Cabbage     | Vegetables | 105 | 87  | 3 | 200  | -     |
| Ma et al. (2014)    | 29.8 | 106.4 | 1223 | 18.4 | 7  | 53 | 40 | Silty clay      | 0.88 | 0.15 | 5.6 | 1.29 | Cabbage     | Vegetables | 247 | 148 | 3 | 200  | -     |
| Ma et al. (2014)    | 29.8 | 106.4 | 1223 | 18.4 | 7  | 53 | 40 | Silty clay      | 0.88 | 0.15 | 5.6 | 1.29 | Cabbage     | Vegetables | 134 | 112 | 3 | 100  | -     |
| Ma et al. (2014)    | 29.8 | 106.4 | 1223 | 18.4 | 7  | 53 | 40 | Silty clay      | 0.88 | 0.15 | 5.6 | 1.29 | Radish      | Vegetables | 203 | 98  | 3 | 600  | -     |
| Ma et al. (2014)    | 29.9 | 106.4 | 965  | 19.4 | 43 | 20 | 38 | Loam            | 1.41 | 0.13 | 5.7 | 1.29 | Maize       | Cereals    | 252 | 141 | 3 | 1400 | -     |
| Ma et al. (2014)    | 29.9 | 106.4 | 965  | 19.4 | 43 | 20 | 38 | Loam            | 1.41 | 0.13 | 5.7 | 1.29 | Lettuce     | Vegetables | 160 | 68  | 3 | 1200 | -     |
| Mu et al. (2006)    | 29.9 | 106.4 | 965  | 19.4 | 43 | 20 | 38 | Loam            | 1.41 | 0.13 | 5.7 | 1.29 | Lettuce     | Vegetables | 214 | 185 | 3 | 300  | -     |
| Ni et al. (2008)    | 29.9 | 106.4 | 965  | 19.4 | 43 | 20 | 38 | Loam            | 1.41 | 0.13 | 5.7 | 1.29 | Pepper      | Vegetables | 191 | 129 | 3 | 2700 | -     |
| Qiao et al. (2014)  | 45.7 | 126.6 | 533  | 3.5  | 18 | 34 | 48 | Silty clay loam | 1.62 | 0.13 | 7.1 | 1.05 | Maize       | Cereals    | 225 | 143 | 4 | 210  | 5.9   |
| Qiao et al. (2014)  | 47.4 | 126.6 | 550  | 1.5  | -  | -  | -  | Silty clay loam | 2.80 | 0.22 | 7.0 | 1.20 | Maize       | Cereals    | 131 | -   | 4 | 530  | 3.9   |
| Qiao et al. (2014)  | 47.4 | 126.6 | 550  | 1.5  | -  | -  | -  | Silty clay loam | 2.80 | 0.22 | 7.0 | 1.20 | Soybean     | Vegetables | 38  | -   | 4 | 360  | 2.2   |
| Shi et al. (2013)   | 47.4 | 126.6 | 550  | 1.5  | -  | -  | -  | Silty clay loam | 2.80 | 0.22 | 7.0 | 1.20 | Wheat       | Cereals    | 131 | -   | 4 | 140  | 1.8   |
| Shi et al. (2013)   | 37.0 | 118.0 | 543  | 12.5 | 74 | 14 | 13 | Sandy loam      | 1.09 | 0.04 | 7.7 | 1.58 | Maize       | Cereals    | 209 | 98  | 4 | 450  | 6.1   |
| Shi et al. (2014)   | 37.0 | 118.0 | 543  | 12.5 | 74 | 14 | 13 | Sandy loam      | 1.09 | 0.04 | 7.7 | 1.58 | Wheat       | Cereals    | 196 | 260 | 5 | 510  | 3.2   |
| Sun et al. (2015)   | 37.0 | 118.0 | 543  | 12.5 | 74 | 14 | 13 | Sandy loam      | -    | 0.04 | 7.7 | 1.52 | Maize       | Cereals    | 243 | -   | 5 | 430  | 5.9   |
| Wang et al. (2010)  | 43.5 | 123.4 | 675  | 7.5  | -  | -  | -  | Sandy clay loam | 1.37 | 0.12 | 7.8 | 1.25 | Rice        | Rice       | 180 | -   | 3 | 40   | -     |
| Wang et al. (2011)  | 31.3 | 105.5 | 826  | 17.3 | 35 | 7  | 59 | Silt loam       | 0.70 | 0.14 | -   | -    | Rice        | Rice       | 150 | 106 | 4 | 930  | -     |
| Wang et al. (2011)  | 31.9 | 118.8 | 1250 | 15.9 | 6  | 14 | 80 | Silt loam       | 0.70 | 0.13 | 5.7 | 1.28 | Rice        | Rice       | 220 | 128 | 4 | 130  | 8.4   |
| Wang et al. (2011)  | 31.9 | 118.8 | 1250 | 15.9 | 6  | 14 | 80 | Silt loam       | 0.70 | 0.13 | 5.7 | 1.28 | Rice        | Rice       | 220 | 128 | 4 | 200  | 9.0   |
| Wang et al. (2014)  | 31.6 | 120.7 | 1178 | 16.6 | 7  | 50 | 43 | Silty clay      | 1.39 | 0.20 | 7.7 | 1.19 | Rice        | Rice       | 180 | 120 | 4 | 180  | 6.1   |
| Wei et al. (2014)   | 35.5 | 104.7 | 380  | 6.5  | -  | -  | -  | Clay loam       | 0.70 | 0.08 | 8.4 | -    | Wheat       | Cereals    | 131 | 121 | 3 | 590  | -     |
| Wu et al. (2013)    | 38.8 | 115.4 | 572  | 12.0 | 43 | 16 | 41 | Loam            | 0.80 | -    | 8.5 | 1.29 | Maize       | Cereals    | 270 | 109 | 3 | 200  | 7.0   |
| Wu et al. (2014)    | 35.2 | 107.7 | 560  | 9.2  | -  | 24 | -  | Clay loam       | 0.65 | 0.08 | 8.4 | -    | Maize       | Cereals    | 180 | 138 | 5 | 550  | 7.3   |
| Wu et al. (2014)    | 35.2 | 107.7 | 560  | 9.2  | -  | 24 | -  | Clay loam       | 0.65 | 0.08 | 8.4 | -    | Maize       | Cereals    | 180 | 138 | 5 | 460  | 4.0   |
| Wu et al. (2014)    | 31.4 | 120.4 | 1139 | 16.0 | 11 | 30 | 59 | Silty clay loam | 1.14 | 0.05 | 6.0 | 1.20 | Wheat       | Cereals    | 247 | -   | 4 | 540  | 1.3   |
| Xiong et al. (2002) | 39.1 | 117.0 | 1552 | 17.3 | 28 | 31 | 40 | Clay loam       | 0.84 | 0.35 | 5.8 | 1.28 | Maize       | Cereals    | 204 | 106 | 3 | 380  | 2.0   |
| Xiong et al. (2002) | 28.3 | 116.9 | 1795 | 17.6 | 79 | 9  | 12 | Loamy sand      | 0.72 | 0.08 | 5.5 | -    | Rice        | Rice       | 262 | 70  | 4 | 180  | -     |
| Xiong et al. (1999) | 28.3 | 116.9 | 1795 | 17.6 | 79 | 9  | 12 | Loamy sand      | 0.72 | 0.08 | 5.5 | -    | Rice        | Rice       | 262 | 98  | 4 | 230  | -     |
| Xiong et al. (1999) | 28.3 | 116.9 | 1795 | 17.6 | 79 | 9  | 12 | Loamy sand      | 0.72 | 0.07 | 4.8 | -    | Soybean     | Vegetables | 35  | 154 | 4 | 660  | -     |
| Xiong et al. (1999) | 28.3 | 116.9 | 1795 | 17.6 | 79 | 9  | 12 | Loamy sand      | 0.72 | 0.07 | 4.8 | -    | Peanut      | Vegetables | 104 | 116 | 4 | 530  | -     |
| Yan et al. (2013)   | 28.3 | 116.9 | 1795 | 17.6 | 79 | 9  | 12 | Loamy sand      | 0.72 | 0.07 | 4.8 | -    | Upland-rice | Rice       | 104 | 127 | 4 | 490  | -     |
| Yan et al. (2013)   | 37.0 | 118.0 | 627  | 14.4 | 17 | 17 | 66 | Silt loam       | -    | 0.11 | 8.3 | 1.42 | Wheat-maize | Cereals    | 500 | 365 | 5 | 540  | 9.6   |
| Yan et al. (2014)   | 37.0 | 118.0 | 627  | 14.4 | 17 | 17 | 66 | Silt loam       | -    | 0.11 | 8.3 | 1.42 | Wheat-maize | Cereals    | 500 | 365 | 5 | 790  | 8.4   |
| Yan et al. (2014)   | 39.5 | 116.4 | 507  | 11.5 | 58 | 8  | 34 | Sandy loam      | -    | 0.09 | 8.3 | -    | Cucumber    | Vegetables | 500 | 94  | - | 470  | -     |
| Yan et al. (2014)   | 41.1 | 121.4 | 610  | 8.7  | 57 | 19 | 23 | Sandy loam      | 1.32 | 0.14 | 7.1 | 1.33 | Maize       | Cereals    | 238 | 120 | 5 | 630  | 8.8   |
| Yang et al. (2011)  | 41.1 | 121.4 | 610  | 8.7  | 57 | 19 | 23 | Sandy loam      | 1.32 | 0.14 | 7.1 | 1.33 | Maize       | Cereals    | 238 | 124 | 5 | 540  | 8.7   |
| Yang et al. (2011)  | 39.4 | 116.2 | -    | 18.0 | -  | -  | -  | Sandy loam      | 1.35 | 1.18 | 7.9 | 1.33 | Cabbage     | Vegetables | 375 | 89  | 4 | 180  | 177.0 |
| Yang et al. (2011)  | 39.4 | 116.2 | -    | 18.0 | -  | -  | -  | Sandy loam      | 1.35 | 1.18 | 7.9 | 1.33 | Cabbage     | Vegetables | 0   | 89  | 4 | 260  | 174.0 |
| Yang et al. (2012)  | 40.1 | 116.7 | -    | 18.0 | -  | -  | -  | Loam            | 0.98 | 0.13 | 7.9 | 1.54 | Tomato      | Vegetables | 0   | 163 | 2 | 2480 | 123.0 |
| Yang et al. (2012)  | 39.4 | 116.2 | -    | 18.0 | -  | -  | -  | Sandy loam      | 1.61 | 0.17 | 7.6 | 1.10 | Celery      | Vegetables | 375 | 80  | 4 | 220  | 141.0 |
| Yao et al. (2009)   | 39.4 | 116.2 | -    | 18.0 | -  | -  | -  | Sandy loam      | 1.61 | 0.17 | 7.6 | 1.10 | Celery      | Vegetables | 375 | 80  | 4 | 190  | 129.0 |
| Yao et al. (2012)   | 32.6 | 119.7 | 924  | 15.9 | 58 | 14 | 29 | Sandy loam      | 1.84 | 0.15 | 8.0 | 1.16 | Wheat       | Cereals    | 0   | 214 | 5 | 880  | -     |
| Yao et al. (2012)   | 32.6 | 119.7 | 924  | 15.9 | 58 | 14 | 29 | Sandy loam      | 1.84 | 0.15 | 8.0 | 1.16 | Rice        | Rice       | 200 | 138 | 5 | 400  | 5.3   |
| Yao et al. (2012)   | 32.6 | 119.7 | 924  | 15.9 | 58 | 14 | 29 | Sandy loam      | 1.84 | 0.15 | 8.0 | 1.16 | Rice        | Rice       | 200 | 138 | 5 | 420  | 4.8   |

|                        |      |       |      |      |    |    |    |                 |      |      |     |      |                        |            |      |     |   |      |         |
|------------------------|------|-------|------|------|----|----|----|-----------------|------|------|-----|------|------------------------|------------|------|-----|---|------|---------|
| Yao et al. (2015)      | 32.6 | 119.7 | 924  | 15.9 | 58 | 14 | 29 | Sandy loam      | 1.84 | 0.15 | 8.0 | 1.16 | Rice                   | Rice       | 0    | 138 | 5 | 330  | 5.6     |
| Yao et al. (2015)      | 32.6 | 119.7 | 924  | 15.9 | 58 | 14 | 29 | Sandy loam      | 1.84 | 0.16 | 7.9 | 1.20 | Amaranth               | Vegetables | 0    | 66  | 5 | 390  | -       |
| Yao et al. (2015)      | 32.6 | 119.7 | 924  | 15.9 | 58 | 14 | 29 | Sandy loam      | 1.84 | 0.16 | 7.9 | 1.20 | Turnip                 | Vegetables | 418  | 81  | 5 | 250  | -       |
| Yao et al. (2012)      | 32.6 | 119.7 | 924  | 15.9 | 58 | 14 | 29 | Sandy loam      | 1.84 | 0.16 | 7.9 | 1.20 | Garlic                 | Vegetables | 393  | 196 | 5 | 90   | -       |
| Yao et al. (2012)      | 32.6 | 110.6 | 834  | 15.3 | 61 | 5  | 34 | Sandy loam      | 1.03 | 0.12 | 6.2 | 1.30 | Rice                   | Rice       | 150  | 365 | 4 | 540  | 5.5     |
| Zhang et al. (2010)    | 33.3 | 120.8 | -    | -    | 65 | 21 | 14 | Sandy clay loam | 1.18 | 0.06 | 8.2 | 1.28 | Jerusalem              | Vegetables | 183  | 153 | 5 | 450  | 6.4     |
| Zhang et al. (2012)    | 31.4 | 119.7 | 1177 | 15.7 | -  | 39 | -  | Loam            | 2.40 | 0.18 | 6.5 | 1.01 | Rice                   | Rice       | 298  | -   | 4 | 760  | 8.6     |
| Zhang et al. (2012)    | 39.2 | 115.3 | 555  | 12.3 | -  | -  | -  | Sandy loam      | 0.89 | 0.11 | 8.1 | 1.20 | Maize                  | Cereals    | 321  | 116 | 4 | 850  | -       |
| Zhang et al. (2014)    | 39.2 | 115.3 | 555  | 12.3 | -  | -  | -  | Sandy loam      | 0.89 | 0.11 | 8.1 | 1.20 | Maize                  | Cereals    | 138  | 106 | 4 | 3090 | -       |
| Zhang et al. (2012)    | 36.2 | 117.1 | 903  | 13.6 | -  | -  | -  | Clay loam       | 0.98 | 0.16 | 7.0 | 1.28 | Wheat-maize            | Cereals    | 465  | 360 | 5 | 1330 | 7.5/8.6 |
| Zhang et al. (2013)    | 39.6 | 115.9 | 635  | 11.9 | -  | -  | -  | Silt loam       | 0.20 | 0.02 | 8.0 | 1.21 | Tomato-cabbage-lettuce | Vegetables | 2122 | 365 | 5 | 1690 | 167.0   |
| Zhao et al. (2015)     | 31.6 | 120.6 | 1042 | 15.5 | -  | -  | -  | Clay loam       | 1.88 | 0.17 | 6.3 | 1.20 | Wheat                  | Cereals    | 210  | 205 | 4 | 620  | 3.2     |
| Zhao et al. (2015)     | 31.5 | 120.7 | -    | -    | 28 | 34 | 29 | Clay loam       | 3.50 | 0.22 | 7.6 | 1.27 | Rice                   | Rice       | 368  | 154 | 4 | 20   | 5.6     |
| Zhao et al. (2014)     | 31.5 | 120.7 | -    | -    | 28 | 34 | 29 | Clay loam       | 3.50 | 0.22 | 7.6 | 1.27 | Rice                   | Rice       | 368  | 154 | 4 | 80   | 5.9     |
| Zhao et al. (2012)     | 42.4 | 123.9 | 700  | 7.4  | 46 | 27 | 27 | Sandy clay loam | 1.06 | -    | 6.9 | 1.27 | Maize                  | Cereals    | 150  | 145 | 3 | 2930 | 9.9     |
| Zhou et al. (2013)     | 31.1 | 121.1 | 1145 | 15.6 | -  | -  | -  | Silty clay loam | 1.63 | 0.12 | 7.1 | 1.34 | Rice                   | Rice       | 300  | 134 | 5 | 60   | -       |
| Zhou et al. (2013)     | 31.3 | 105.5 | 826  | 17.3 | 35 | 7  | 59 | Silt loam       | 0.85 | 0.10 | 8.3 | 1.32 | Wheat                  | Cereals    | 200  | 199 | 4 | 1290 | -       |
| Zhou et al. (2013)     | 31.3 | 105.5 | 826  | 17.3 | 35 | 7  | 59 | Silt loam       | 0.85 | 0.10 | 8.3 | 1.32 | Maize                  | Cereals    | 200  | 113 | 4 | 930  | -       |
| Zhou et al. (2013)     | 31.3 | 105.5 | 826  | 17.3 | 35 | 7  | 59 | Silt loam       | 0.85 | 0.10 | 8.3 | 1.32 | Wheat                  | Cereals    | 200  | 198 | 4 | 710  | -       |
| Zhou et al. (2013)     | 31.3 | 105.5 | 826  | 17.3 | 35 | 7  | 59 | Silt loam       | 0.85 | 0.10 | 8.3 | 1.32 | Maize                  | Cereals    | 200  | 113 | 4 | 170  | -       |
| Zhou et al. (2013)     | 31.3 | 105.5 | 826  | 17.3 | 35 | 7  | 59 | Silt loam       | 0.85 | 0.10 | 8.3 | 1.32 | Wheat                  | Cereals    | 200  | 202 | 4 | 410  | -       |
| Zhou et al. (2016)     | 31.3 | 105.5 | 826  | 17.3 | 35 | 7  | 59 | Silt loam       | 0.85 | 0.10 | 8.3 | 1.32 | Maize                  | Cereals    | 200  | 119 | 4 | 130  | -       |
| Zhou et al. (2014)     | 31.3 | 105.5 | 826  | 17.3 | 34 | 30 | 36 | Clay loam       | 0.64 | 0.06 | 8.3 | 1.32 | Wheat-maize            | Cereals    | 280  | 330 | 4 | 140  | 1.0     |
| Zhou et al. (2014)     | 32.0 | 118.8 | 1050 | 15.7 | 6  | 14 | 80 | Silt loam       | 1.26 | 0.13 | 6.8 | 1.20 | Rice                   | Rice       | 293  | 135 | 4 | 230  | -       |
| Zhou et al. (2014)     | 32.0 | 118.8 | 1050 | 15.7 | 6  | 14 | 80 | Silt loam       | 1.26 | 0.13 | 6.8 | 1.20 | Wheat                  | Cereals    | 250  | 212 | 4 | 570  | -       |
| Zhu et al. (2009&2012) | 32.0 | 118.8 | 1050 | 15.7 | 6  | 14 | 80 | Silt loam       | 1.26 | 0.13 | 6.8 | 1.20 | Wheat                  | Cereals    | 250  | 212 | 4 | 760  | -       |
| Zhu et al. (2009&2012) | 37.6 | 112.9 | 450  | 9.8  | -  | -  | -  | Clay loam       | 0.94 | 0.18 | 8.5 | 1.33 | Maize                  | Cereals    | 180  | -   | 4 | 250  | 8.8     |
| Zhu et al. (2009&2012) | 37.6 | 112.9 | 450  | 9.8  | -  | -  | -  | Clay loam       | 0.94 | 0.18 | 8.5 | 1.33 | Maize                  | Cereals    | 180  | -   | 4 | 150  | 8.4     |
| Zhu et al. (2009&2012) | 37.6 | 112.9 | 450  | 9.8  | -  | -  | -  | Clay loam       | 0.94 | 0.18 | 8.5 | 1.33 | Maize                  | Cereals    | 180  | -   | 4 | 330  | 9.9     |
| Zou et al. (2002)      | 37.6 | 112.9 | 450  | 9.8  | -  | -  | -  | Clay loam       | 0.94 | 0.18 | 8.5 | 1.33 | Maize                  | Cereals    | 180  | -   | 4 | 510  | 9.7     |
| Zou et al. (2002)      | 31.9 | 118.8 | 1000 | 25.0 | 4  | 51 | 45 | Silty clay      | 1.31 | 0.11 | 6.7 | 1.29 | Rice                   | Rice       | 300  | 117 | 5 | 1380 | -       |
| Zou_et_al. (2009)      | 31.9 | 118.8 | 1000 | 25.0 | 4  | 51 | 45 | Silty clay      | 1.31 | 0.11 | 6.7 | 1.29 | Wheat                  | Rice       | 300  | 207 | 5 | 2840 | -       |
| Zou_et_al. (2009)      | 31.9 | 118.8 | 1000 | 25.0 | -  | -  | -  | Sandy soil      | 1.52 | 0.17 | 6.3 | -    | Paddy rice             | Rice       | 200  | 120 | 4 | 300  | 3.2     |
| Zheng et al. (2000)    | 31.9 | 118.8 | 1000 | 25.0 | -  | -  | -  | Sandy soil      | 1.52 | 0.17 | 6.3 | -    | Paddy rice             | Rice       | 200  | 120 | 4 | 810  | 3.9     |
| Zheng et al. (2000)    | 31.3 | 120.6 | 1080 | 16.0 | -  | 47 | -  | Loam clay       | 2.03 | 0.19 | 6.5 | -    | Rice                   | Rice       | 191  | 140 | 3 | 728  | -       |
| Zheng et al. (2000)    | 31.3 | 120.6 | 1080 | 16.0 | -  | 47 | -  | Loam clay       | 2.03 | 0.19 | 6.5 | -    | Wheat                  | Cereals    | 31   | 228 | 3 | 3238 | -       |
| Zheng et al. (2000)    | 31.3 | 120.6 | 1080 | 16.0 | -  | 47 | -  | Loam clay       | 2.03 | 0.19 | 6.5 | -    | Rice                   | Rice       | 191  | 140 | 3 | 787  | -       |
| Zhang et al. (2018)    | 31.3 | 120.6 | 1080 | 16.0 | -  | 47 | -  | Loam clay       | 2.03 | 0.19 | 6.5 | -    | Wheat                  | Cereals    | 31   | 228 | 3 | 8124 | -       |
| Zhang et al. (2018)    | 39.6 | 115.9 | 635  | 11.9 | 14 | 23 | 63 | Silt loam       | 3.40 | 0.19 | 8.0 | 1.20 | Tomato                 | Vegetables | 1300 | 107 | 3 | 3270 | 75.1    |
| Zhang et al. (2018)    | 39.6 | 115.9 | 635  | 11.9 | 14 | 23 | 63 | Silt loam       | 3.40 | 0.19 | 8.0 | 1.20 | Cabbage                | Vegetables | 733  | 358 | 3 | 460  | 36.9    |
| Zhang et al. (2018)    | 39.6 | 115.9 | 635  | 11.9 | 14 | 23 | 63 | Silt loam       | 3.40 | 0.19 | 8.0 | 1.20 | Tomato                 | Vegetables | 1300 | 156 | 3 | 1150 | 85.0    |
| Zhang et al. (2018)    | 39.6 | 115.9 | 635  | 11.9 | 14 | 23 | 63 | Silt loam       | 3.40 | 0.19 | 8.0 | 1.20 | Pakchoi                | Vegetables | 84   | 90  | 3 | 360  | 67.5    |
| Zhang et al. (2018)    | 39.6 | 115.9 | 635  | 11.9 | 14 | 23 | 63 | Silt loam       | 3.40 | 0.19 | 8.0 | 1.20 | Lettuce                | Vegetables | 733  | 119 | 3 | 150  | 13.8    |
| Zhang et al. (2018)    | 39.6 | 115.9 | 635  | 11.9 | 14 | 23 | 63 | Silt loam       | 3.40 | 0.19 | 8.0 | 1.20 | Tomato                 | Vegetables | 1325 | 166 | 3 | 1070 | 84.1    |

|                               |      |       |      |      |    |    |    |                 |      |      |     |      |              |            |         |     |   |       |       |
|-------------------------------|------|-------|------|------|----|----|----|-----------------|------|------|-----|------|--------------|------------|---------|-----|---|-------|-------|
| Zhang et al. (2016)           | 39.6 | 115.9 | 635  | 11.9 | 14 | 23 | 63 | Silt loam       | 3.40 | 0.19 | 8.0 | 1.20 | Cabbage      | Vegetables | 733     | 87  | 3 | 590   | 39.7  |
| Yao et al. (2013)             | 32.6 | 119.7 | 924  | 15.9 | 58 | 14 | 28 | Sandy loam      | 1.84 | 0.15 | 8.0 | -    | Rice         | Rice       | 250     | 122 | 3 | 340   | 5.9   |
| Yao et al. (2013)             | 32.6 | 119.7 | 924  | 15.9 | 58 | 14 | 28 | Sandy loam      | 1.84 | 0.15 | 8.0 | -    | Wheat        | Cereals    | 225     | 212 | 3 | 780   | 2.4   |
| Yao et al. (2013)             | 32.6 | 119.7 | 924  | 15.9 | 58 | 14 | 28 | Sandy loam      | 1.84 | 0.15 | 8.0 | -    | Rice         | Rice       | 250     | 122 | 3 | 400   | 5.3   |
| Yao et al. (2013)             | 32.6 | 119.7 | 924  | 15.9 | 58 | 14 | 28 | Sandy loam      | 1.84 | 0.15 | 8.0 | -    | Wheat        | Cereals    | 225     | 212 | 3 | 850   | 2.9   |
| Yao et al. (2013)             | 32.6 | 119.7 | 924  | 15.9 | 58 | 14 | 28 | Sandy loam      | 1.84 | 0.15 | 8.0 | -    | Rice         | Rice       | 250     | 122 | 3 | 420   | 4.8   |
| Yao et al. (2013)             | 32.6 | 119.7 | 924  | 15.9 | 58 | 14 | 28 | Sandy loam      | 1.84 | 0.15 | 8.0 | -    | Wheat        | Cereals    | 225     | 212 | 3 | 1180  | 3.1   |
| Yao et al. (2013)             | 32.6 | 119.7 | 924  | 15.9 | 58 | 14 | 28 | Sandy loam      | 1.84 | 0.15 | 8.0 | -    | Rice         | Rice       | 250     | 122 | 3 | 330   | 5.6   |
| Yao et al. (2013)             | 32.6 | 119.7 | 924  | 15.9 | 58 | 14 | 28 | Sandy loam      | 1.84 | 0.15 | 8.0 | -    | Wheat        | Cereals    | 225     | 212 | 3 | 830   | 2.7   |
| Yao et al. (2013)             | 32.6 | 119.7 | 924  | 15.9 | 58 | 14 | 28 | Sandy loam      | 1.84 | 0.15 | 8.0 | -    | Rice         | Rice       | 250     | 122 | 3 | 370   | 5.4   |
| Yao et al. (2010)             | 32.6 | 119.7 | 924  | 15.9 | 58 | 14 | 28 | Sandy loam      | 1.84 | 0.15 | 8.0 | -    | Wheat        | Cereals    | 225     | 212 | 3 | 910   | 2.7   |
| Yao et al. (2010)             | 37.0 | 118.0 | 586  | 13.0 | 17 | 17 | 66 | Silt loam       | 1.03 | 0.11 | 8.3 | 1.42 | Maize        | Cereals    | 420     | 99  | 3 | 150   | 6.6   |
| Yao et al. (2010)             | 37.0 | 118.0 | 586  | 13.0 | 17 | 17 | 66 | Silt loam       | 1.03 | 0.11 | 8.3 | 1.42 | Wheat        | Cereals    | 420     | 246 | 3 | 220   | 3.2   |
| Yao et al. (2010)             | 36.8 | 117.5 | 600  | 12.8 | 21 | 25 | 54 | Silt loam       | 0.96 | 0.09 | 8.1 | 1.38 | Welsh onion  | Vegetables | 476     | 155 | 3 | 440   | 5.2   |
| Yao et al. (2010)             | 36.8 | 117.5 | 600  | 12.8 | 21 | 25 | 54 | Silt loam       | 0.96 | 0.09 | 8.1 | 1.38 | Wheat        | Cereals    | 485     | 247 | 3 | 580   | 4.1   |
| Yao et al. (2010)             | 37.0 | 118.0 | 210  | 9.8  | -  | -  | -  | Clay loam       | 1.74 | 0.10 | 7.7 | 1.52 | Winter wheat | Cereals    | 125     | 245 | 3 | 253   | 7.0   |
| Yao et al. (2010)             | 35.3 | 107.9 | 375  | 9.7  | -  | -  | -  | -               | 0.81 | 0.10 | 8.3 | 1.30 | Maize        | Cereals    | 225     | 153 | 3 | 128.5 | 6.1   |
| Yao et al. (2017)             | 39.2 | 115.1 | 555  | 12.3 | -  | -  | -  | Sandy loam      | 0.89 | 0.11 | 8.1 | -    | Wheat        | Cereals    | 165     | 243 | 3 | 590   | 2.1   |
| Yao et al. (2017)             | 39.2 | 115.1 | 555  | 12.3 | -  | -  | -  | Sandy loam      | 0.89 | 0.11 | 8.1 | -    | Wheat        | Cereals    | 117     | 243 | 3 | 550   | 2.1   |
| Yao et al. (2017)             | 39.2 | 115.1 | 555  | 12.3 | -  | -  | -  | Sandy loam      | 0.89 | 0.11 | 8.1 | -    | Maize        | Cereals    | 176     | 105 | 3 | 650   | 5.1   |
| Yao et al. (2017)             | 39.2 | 115.1 | 555  | 12.3 | -  | -  | -  | Sandy loam      | 0.89 | 0.11 | 8.1 | -    | Maize        | Cereals    | 123     | 105 | 3 | 590   | 5.8   |
| Xu et al. (2019)              | 38.8 | 115.4 | 500  | 13.0 | 23 | 6  | 71 | Silty loam      | 1.13 | 0.15 | 8.3 | -    | Wheat        | Cereals    | 285     | -   | 3 | 550   | -     |
| Wang et al. (2016)            | 38.8 | 115.4 | 500  | 13.0 | 23 | 6  | 71 | Silty loam      | 1.13 | 0.15 | 8.3 | -    | Wheat        | Cereals    | 225     | -   | 3 | 550   | -     |
| Tian et al. (2020)            | 38.8 | 115.4 | 500  | 13.0 | 23 | 6  | 71 | Silty loam      | 1.13 | 0.15 | 8.3 | -    | Wheat        | Cereals    | 225     | -   | 3 | 550   | -     |
| Tian et al. (2020)            | 38.8 | 115.4 | 500  | 13.0 | 23 | 6  | 71 | Silty loam      | 1.13 | 0.15 | 8.3 | -    | Wheat        | Cereals    | 245     | -   | 3 | 550   | -     |
| Tian et al. (2020)            | 38.8 | 115.4 | 500  | 13.0 | 23 | 6  | 71 | Silty loam      | 1.13 | 0.15 | 8.3 | -    | Maize        | Cereals    | 390     | -   | 3 | 750   | -     |
| Shu et al. (2021)             | 38.8 | 115.4 | 500  | 13.0 | 23 | 6  | 71 | Silty loam      | 1.13 | 0.15 | 8.3 | -    | Maize        | Cereals    | 300     | -   | 3 | 750   | -     |
| Shu et al. (2021)             | 38.8 | 115.4 | 500  | 13.0 | 23 | 6  | 71 | Silty loam      | 1.13 | 0.15 | 8.3 | -    | Wheat        | Cereals    | 225     | -   | 3 | 550   | 4.0   |
| Xu et al. (2019)              | 38.8 | 115.4 | 500  | 13.0 | 23 | 6  | 71 | Silty loam      | 1.13 | 0.15 | 8.3 | -    | Maize        | Cereals    | 300     | -   | 3 | 750   | 4.0   |
| Li et al. (2020)              | 23.3 | 113.6 | 1517 | 22.5 | 41 | 26 | 34 | -               | 2.23 | 0.13 | 5.1 | 1.15 | Vegetables   | Vegetables | 1010    | 347 | 3 | 12900 | 106.0 |
| Htun et al. (2017)            | 34.3 | 108.0 | 550  | 12.9 | 16 | 32 | 52 | -               | 1.71 | 0.10 | 7.4 | 1.21 | Winter wheat | Cereals    | 220     | 365 | 3 | 146   | 4.3   |
| Cao et al. (2006)             | 29.3 | 120.2 | -    | -    | -  | 21 | -  | -               | 1.47 | 1.52 | 7.7 | 1.40 | Cabbage      | Vegetables | 333     | 93  | 3 | 1770  | -     |
| Hua et al. (1997)             | 28.3 | 116.9 | -    | -    | -  | 21 | -  | Loamy clay      | 1.11 | 1.16 | 8.0 | 1.41 | Rice         | Rice       | 100     | 105 | 3 | 136.6 | -     |
| Zhang and Zhang et al. (2011) | 29.9 | 115.5 | 1361 | 16.8 | -  | 21 | -  | Silty clay loam | 1.57 | 2.70 | 5.9 | 1.28 | Rice         | Rice       | 210     | 126 | 3 | 280   | 6.6   |
| Zhang and Zhang et al. (2011) | 29.9 | 115.5 | 1361 | 16.8 | -  | 21 | -  | Silty clay loam | 1.57 | 3.34 | 5.4 | 1.31 | Rice         | Rice       | 210     | 126 | 3 | 440   | 6.5   |
| Cai et al. (1997)             | 32.5 | 118.6 | 724  | 14.5 | 41 | 20 | 39 | Loam            | 1.07 | 0.12 | 8.0 | 1.47 | Rice         | rice       | 100-300 | 115 | 3 | 130   | 5.2   |
| Chen et al. (2002)            | 41.5 | 122.4 | 680  | 7.5  | -  | 22 | -  | Silt loam       | 2.94 | 0.08 | 6.7 | 1.27 | Soybean      | Vegetables | 50-100  | 123 | 3 | 910   | -     |
| Chen et al. (2002)            | 41.5 | 122.4 | 680  | 7.5  | -  | 22 | -  | Silt loam       | 1.10 | 0.08 | 6.7 | 1.46 | Maize        | Cereals    | 150-250 | 123 | 3 | 800   | -     |
| Chen et al. (2002)            | 41.5 | 122.4 | 680  | 7.5  | -  | 22 | -  | Silt loam       | 1.28 | 0.08 | 6.7 | 1.46 | Maize        | Cereals    | 150-250 | 123 | 3 | 800   | -     |
| Chen et al. (2008)            | 32.0 | 119.3 | 724  | 14.5 | 29 | 55 | 16 | Sand clay loam  | 1.67 | 0.11 | 6.1 | 1.41 | Wheat        | Cereals    | 100-300 | 206 | 3 | 2600  | 1.2   |
| Chen et al. (2008)            | 32.0 | 119.3 | 724  | 14.5 | 29 | 55 | 16 | Sand clay loam  | 1.67 | 0.11 | 6.1 | 1.41 | Wheat        | Cereals    | 100-300 | 206 | 3 | 2600  | 3.7   |
| Chen et al. (2016)            | 28.1 | 112.3 | 1358 | 16.8 | -  | 48 | -  | Silty clay loam | 1.29 | 0.26 | 6.1 | 1.29 | Rice         | Rice       | 165-225 | 79  | 3 | 127.5 | 7.8   |
| Chen et al. (2016)            | 28.1 | 112.3 | 1358 | 16.8 | -  | 48 | -  | Silty clay loam | 1.29 | 0.26 | 6.1 | 1.29 | Rice         | Rice       | 165-225 | 85  | 3 | 133.4 | 7.8   |
| Chen et al. (2016)            | 28.1 | 112.3 | 1358 | 16.8 | -  | 48 | -  | Silty clay loam | 1.29 | 0.26 | 6.1 | 1.29 | Rice         | Rice       | 165-225 | 94  | 3 | 255.3 | 6.2   |

|                     |      |       |         |       |    |    |    |                 |      |      |     |      |               |            |         |     |   |         |     |
|---------------------|------|-------|---------|-------|----|----|----|-----------------|------|------|-----|------|---------------|------------|---------|-----|---|---------|-----|
| Chen et al. (2016)  | 28.1 | 112.3 | 1358    | 16.8  | -  | 48 | -  | Silty clay loam | 1.29 | 0.26 | 6.1 | 1.29 | Rice          | Rice       | 165-225 | 96  | 3 | 331.4   | 6.3 |
| Deng et al. (2012)  | 31.6 | 120.5 | 1080    | 16.0  | 28 | 31 | 41 | Clay loam       | 1.50 | 0.16 | 6.8 | 1.20 | Rice          | Rice       | 250     | 136 | 3 | 430     | -   |
| Deng et al. (2012)  | 31.6 | 120.5 | 1080    | 16.0  | 28 | 31 | 41 | Clay loam       | 1.50 | 0.16 | 6.8 | 1.20 | Wheat         | Cereals    | 180     | 203 | 3 | 960     | -   |
| Deng et al. (2018)  | 45.8 | 126.8 | 508-583 | 26-27 | -  | 23 | -  | Mollisols       | 1.95 | -    | -   | 1.30 | Rice          | Rice       | 75-225  | 118 | 3 | 1690.68 | 5.0 |
| Deng et al. (2018)  | 45.8 | 126.8 | 508-583 | 26-27 | -  | 23 | -  | Mollisols       | 1.95 | -    | -   | 1.30 | Rice          | Rice       | 75-225  | 111 | 3 | 2046.61 | 4.7 |
| He et al. (2018)    | 31.2 | 120.8 | 1139    | 16.0  | -  | 21 | -  | Anthrosol.      | 2.26 | 0.18 | 5.6 | 1.25 | Wheat         | Cereals    | 125-150 | 179 | 4 | 260     | 1.3 |
| Huang et al. (2013) | 38.8 | 116.5 | 500-700 | 10.0  | 40 | 28 | 32 | Clay loam       | 0.71 | 0.08 | 8.1 | 1.31 | Maize         | Cereals    | 260     | 106 | 3 | 90      | 2.7 |
| Huang et al. (2013) | 38.8 | 116.5 | 500-700 | 10.0  | 40 | 28 | 32 | Clay loam       | 0.71 | 0.08 | 8.1 | 1.31 | Maize         | Cereals    | 260     | 106 | 3 | 200     | 2.9 |
| Huang et al. (2013) | 38.8 | 116.5 | 500-700 | 10.0  | 40 | 28 | 32 | Clay loam       | 0.71 | 0.08 | 8.1 | 1.31 | Wheat         | Cereals    | 300     | 258 | 3 | 110     | 5.4 |
| Huang et al. (2013) | 38.8 | 116.5 | 500-700 | 10.0  | 40 | 28 | 32 | Clay loam       | 0.71 | 0.08 | 8.1 | 1.31 | Wheat         | Cereals    | 300     | 258 | 3 | 340     | 5.0 |
| Huang et al. (2013) | 38.8 | 116.5 | 500-700 | 10.0  | 40 | 28 | 32 | Clay loam       | 0.71 | 0.08 | 8.1 | 1.31 | Maize         | Cereals    | 260     | 106 | 3 | 170     | 2.4 |
| Huang et al. (2013) | 38.8 | 116.5 | 500-700 | 10.0  | 40 | 28 | 32 | Clay loam       | 0.71 | 0.08 | 8.1 | 1.31 | Maize         | Cereals    | 260     | 106 | 3 | 190     | 2.5 |
| Huang et al. (2013) | 38.8 | 116.5 | 500-700 | 10.0  | 40 | 28 | 32 | Clay loam       | 0.71 | 0.08 | 8.1 | 1.31 | Wheat         | Cereals    | 300     | 257 | 3 | 300     | 3.9 |
| Huang et al. (2013) | 38.8 | 116.5 | 500-700 | 10.0  | 40 | 28 | 32 | Clay loam       | 0.71 | 0.08 | 8.1 | 1.31 | Wheat         | Cereals    | 300     | 257 | 3 | 640     | 4.5 |
| Huang et al. (2017) | 39.8 | 116.5 | 500-700 | 10.0  | 40 | 28 | 32 | Clay loam       | 0.71 | 0.08 | 8.1 | 1.31 | Maize         | Cereals    | 260     | 104 | 3 | 88.6    | -   |
| Huang et al. (2017) | 39.8 | 116.5 | 500-700 | 10.0  | 40 | 28 | 32 | Clay loam       | 0.71 | 0.08 | 8.1 | 1.31 | Maize         | Cereals    | 260     | 104 | 3 | 88.6    | -   |
| Huang et al. (2017) | 39.8 | 116.5 | 500-700 | 10.0  | 40 | 28 | 32 | Clay loam       | 0.71 | 0.08 | 8.1 | 1.31 | Maize         | Cereals    | 260     | 107 | 3 | 126.6   | -   |
| Huang et al. (2017) | 39.8 | 116.5 | 500-700 | 10.0  | 40 | 28 | 32 | Clay loam       | 0.71 | 0.08 | 8.1 | 1.31 | Maize         | Cereals    | 260     | 107 | 3 | 126.6   | -   |
| Huang et al. (2017) | 39.8 | 116.5 | 500-700 | 10.0  | 40 | 28 | 32 | Clay loam       | 0.71 | 0.08 | 8.1 | 1.31 | Maize         | Cereals    | 260     | 102 | 3 | 177.22  | -   |
| Huang et al. (2017) | 39.8 | 116.5 | 500-700 | 10.0  | 40 | 28 | 32 | Clay loam       | 0.71 | 0.08 | 8.1 | 1.31 | Maize         | Cereals    | 260     | 102 | 3 | 177.22  | -   |
| Huang et al. (2017) | 39.8 | 116.5 | 500-700 | 10.0  | 40 | 28 | 32 | Clay loam       | 0.71 | 0.08 | 8.1 | 1.31 | Wheat         | Cereals    | 300     | 257 | 3 | 329.11  | -   |
| Huang et al. (2017) | 39.8 | 116.5 | 500-700 | 10.0  | 40 | 28 | 32 | Clay loam       | 0.71 | 0.08 | 8.1 | 1.31 | Wheat         | Cereals    | 300     | 257 | 3 | 329.11  | -   |
| Huang et al. (2017) | 39.8 | 116.5 | 500-700 | 10.0  | 40 | 28 | 32 | Clay loam       | 0.71 | 0.08 | 8.1 | 1.31 | Wheat         | Cereals    | 300     | 259 | 3 | 189.873 | -   |
| Huang et al. (2017) | 39.8 | 116.5 | 500-700 | 10.0  | 40 | 28 | 32 | Clay loam       | 0.71 | 0.08 | 8.1 | 1.31 | Wheat         | Cereals    | 300     | 259 | 3 | 189.873 | -   |
| Huang et al. (2017) | 39.8 | 116.5 | 500-700 | 10.0  | 40 | 28 | 32 | Clay loam       | 0.71 | 0.08 | 8.1 | 1.31 | Wheat         | Cereals    | 300     | 258 | 3 | 303.797 | -   |
| Huang et al. (2017) | 39.8 | 116.5 | 500-700 | 10.0  | 40 | 28 | 32 | Clay loam       | 0.71 | 0.08 | 8.1 | 1.31 | Wheat         | Cereals    | 300     | 258 | 3 | 303.797 | -   |
| Ju et al. (2011)    | 40.1 | 116.5 | 500-700 | 10.0  | 27 | 16 | 57 | Silt soil       | 2.13 | 0.12 | 7.9 | 1.34 | Maize         | Cereals    | 50-122  | 92  | 4 | 150     | -   |
| Ju et al. (2011)    | 40.1 | 116.5 | 500-700 | 10.0  | 27 | 16 | 57 | Silt loam       | 2.13 | 0.12 | 7.9 | 1.34 | Wheat         | Cereals    | 66-104  | 273 | 4 | 30      | -   |
| Ju et al. (2011)    | 40.1 | 116.5 | 500-700 | 10.0  | 27 | 16 | 57 | Silt loam       | 2.13 | 0.12 | 7.9 | 1.34 | Maize         | Cereals    | 50-122  | 92  | 4 | 154.4   | -   |
| Ju et al. (2011)    | 40.1 | 116.5 | 500-700 | 10.0  | 27 | 16 | 57 | Silt loam       | 2.13 | 0.12 | 7.9 | 1.34 | Wheat         | Cereals    | 66-104  | 273 | 4 | 134     | -   |
| Ju et al. (2011)    | 40.1 | 116.5 | 500-700 | 10.0  | 27 | 16 | 57 | Silt loam       | 2.13 | 0.12 | 7.9 | 1.34 | Maize         | Cereals    | 50-122  | 92  | 4 | 50      | -   |
| Ju et al. (2011)    | 40.1 | 116.5 | 500-700 | 10.0  | 27 | 16 | 57 | Silt loam       | 2.13 | 0.12 | 7.9 | 1.34 | Wheat         | Cereals    | 66-104  | 274 | 4 | 128     | -   |
| Ju et al. (2011)    | 40.1 | 116.5 | 500-700 | 10.0  | 27 | 16 | 57 | Silt loam       | 2.13 | 0.12 | 7.9 | 1.34 | Maize         | Cereals    | 50-122  | 92  | 4 | 157     | -   |
| Lan et al. (2013)   | 33.4 | 118.9 | 1198    | 15.7  | 1  | 16 | 83 | Clay soil       | 1.49 | 0.14 | 8.3 | 1.38 | Wheat         | Cereals    | 300     | 212 | 3 | 1760    | -   |
| Lan et al. (2013)   | 31.4 | 119.8 | 1198    | 15.7  | 1  | 16 | 83 | Clay soil       | 1.49 | 0.14 | 6.2 | 1.41 | Wheat         | Cereals    | 300     | 212 | 3 | 1910    | -   |
| Li et al. (2015)    | 33.0 | 118.9 | 1107    | 15.4  | 5  | 30 | 65 | Silty clay loam | 1.59 | 0.21 | 5.1 | 1.35 | Amaranth      | Vegetables | 312-416 | 89  | 3 | 5700    | -   |
| Li et al. (2015)    | 33.0 | 118.9 | 1107    | 15.4  | 5  | 30 | 65 | Silty clay loam | 1.59 | 0.21 | 5.1 | 1.35 | Tung choy     | Vegetables | 600-800 | 131 | 3 | 12600   | -   |
| Li et al. (2015)    | 33.0 | 118.9 | 1107    | 15.4  | 5  | 30 | 65 | Silty clay loam | 1.59 | 0.21 | 5.1 | 1.35 | Baby bok choy | Vegetables | 250-333 | 127 | 3 | 600     | -   |
| Li et al. (2015)    | 33.0 | 118.9 | 1107    | 15.4  | 5  | 30 | 65 | Silty clay loam | 1.59 | 0.21 | 5.1 | 1.35 | Baby bok choy | Vegetables | 312-416 | 58  | 3 | 600     | -   |
| Ma et al. (2007)    | 31.3 | 119.9 | -       | -     | -  | 1  | -  | -               | 1.26 | 0.13 | 6.2 | 1.27 | Rice          | Rice       | 200-270 | 131 | 3 | 31.8888 | 6.3 |
| Ma et al. (2007)    | 31.3 | 119.9 | -       | -     | -  | 1  | -  | -               | 1.26 | 0.13 | 6.2 | 1.27 | Rice          | Rice       | 200-270 | 131 | 3 | 45.2016 | 6.7 |
| Ma et al. (2007)    | 31.3 | 119.9 | -       | -     | -  | 1  | -  | -               | 1.26 | 0.13 | 6.2 | 1.27 | Rice          | Rice       | 200-270 | 131 | 3 | 20.7432 | 5.6 |
| Ma et al. (2007)    | 31.3 | 119.9 | -       | -     | -  | 1  | -  | -               | 1.26 | 0.13 | 6.2 | 1.27 | Rice          | Rice       | 200-270 | 131 | 3 | 51.7032 | 6.1 |
| Ma et al. (2007)    | 31.3 | 119.9 | -       | -     | -  | 1  | -  | -               | 1.26 | 0.13 | 6.2 | 1.27 | Rice          | Rice       | 200-270 | 135 | 3 | 40.8576 | 5.8 |

|                      |      |       |          |           |    |    |    |                 |      |      |     |      |          |            |         |     |   |         |         |
|----------------------|------|-------|----------|-----------|----|----|----|-----------------|------|------|-----|------|----------|------------|---------|-----|---|---------|---------|
| Ma et al. (2007)     | 31.3 | 119.9 | -        | -         | -  | 1  | -  | -               | 1.26 | 0.13 | 6.2 | 1.27 | Rice     | Rice       | 200-270 | 135 | 3 | 46.9224 | 6.5     |
| Ma et al. (2013)     | 31.6 | 120.7 | 704-1250 | 13.6-16.1 | -  | 24 | -  | Silty clay loam | 2.03 | 0.21 | 7.4 | 1.11 | Wheat    | Cereals    | -       | 199 | 3 | 570     | 1.8     |
| Ma et al. (2013)     | 31.6 | 120.7 | 704-1250 | 13.6-16.1 | -  | 24 | -  | Silty clay loam | 2.03 | 0.21 | 7.4 | 1.11 | Wheat    | Cereals    | -       | 199 | 3 | 620     | 1.7     |
| Ni et al. (2012)     | 45.7 | 126.6 | 533      | 3.5       | 18 | 23 | 48 | Clay loam       | 1.62 | 0.13 | 7.1 | 1.30 | Maize    | Cereals    | 225     | 143 | 3 | 209     | 5.5     |
| Niu et al. (2019)    | 35.0 | 114.4 | 615      | 19.3      | -  | 6  | -  | -               | 0.42 | 0.06 | 8.3 | 1.53 | Wheat    | Cereals    | 225     | 236 | 3 | 180     | 3.5     |
| Niu et al. (2019)    | 35.0 | 114.4 | 615      | 19.3      | -  | 6  | -  | -               | 0.42 | 0.06 | 8.3 | 1.53 | Wheat    | Cereals    | 225     | 236 | 3 | 220     | 3.8     |
| Niu et al. (2019)    | 35.0 | 114.4 | 615      | 19.3      | -  | 6  | -  | -               | 0.42 | 0.06 | 8.3 | 1.53 | Maize    | Cereals    | 225     | 96  | 3 | 360     | 7.3     |
| Niu et al. (2019)    | 35.0 | 114.4 | 615      | 19.3      | -  | 6  | -  | -               | 0.42 | 0.06 | 8.3 | 1.53 | Maize    | Cereals    | 225     | 96  | 3 | 350     | 7.3     |
| Song & Zhang (2009)  | 47.6 | 133.5 | 550-560  | 1.9       | -  | 47 | -  | Silty clay      | 3.68 | 0.31 | 6.1 | 1.54 | Maize    | Cereals    | 250     | 101 | 3 | 440     | -       |
| Sun et al. (2017)    | 29.1 | 106.2 | 1117     | 18.4      | -  | 21 | -  | -               | 0.75 | 0.20 | 6.9 | 1.15 | Rice     | Rice       | 225     | 132 | 3 | 60      | -       |
| Sun et al. (2017)    | 29.1 | 106.2 | 1117     | 18.4      | -  | 21 | -  | -               | 0.75 | 0.20 | 6.9 | 1.15 | Rice     | Rice       | 225     | 130 | 3 | 60      | -       |
| Sun et al. (2017)    | 29.1 | 106.2 | 1117     | 18.4      | -  | 21 | -  | -               | 1.56 | 0.20 | 6.9 | 1.15 | Wheat    | Cereals    | 180     | 183 | 3 | 1100    | -       |
| Sun et al. (2017)    | 29.1 | 106.2 | 1117     | 18.4      | -  | 21 | -  | -               | 1.56 | 0.20 | 6.9 | 1.15 | Wheat    | Cereals    | 180     | 183 | 3 | 400     | -       |
| Sun et al. (2017)    | 29.1 | 106.2 | 1117     | 18.4      | -  | 21 | -  | -               | 0.75 | 0.20 | 6.9 | 1.15 | Rice     | Rice       | 225     | 108 | 3 | 90      | -       |
| Sun et al. (2017)    | 29.1 | 106.2 | 1117     | 18.4      | -  | 21 | -  | -               | 0.75 | 0.20 | 6.9 | 1.15 | Rice     | Rice       | 225     | 124 | 3 | 100     | -       |
| Sun et al. (2017)    | 29.1 | 106.2 | 1117     | 18.4      | -  | 21 | -  | -               | 1.56 | 0.20 | 6.9 | 1.15 | Wheat    | Cereals    | 180     | 183 | 3 | 480     | -       |
| Sun et al. (2017)    | 29.1 | 106.2 | 1117     | 18.4      | -  | 21 | -  | -               | 1.56 | 0.20 | 6.9 | 1.15 | Wheat    | Cereals    | 180     | 183 | 3 | 980     | -       |
| Sun et al. (2017)    | 29.1 | 106.2 | 1117     | 18.4      | -  | 21 | -  | -               | 1.56 | 0.20 | 6.9 | 1.15 | Maize    | Cereals    | 225     | 108 | 3 | 1370    | -       |
| Sun et al. (2017)    | 29.1 | 106.2 | 1117     | 18.4      | -  | 21 | -  | -               | 1.56 | 0.20 | 6.9 | 1.15 | Maize    | Cereals    | 225     | 124 | 3 | 1850    | -       |
| Tan et al. (2017)    | 37.0 | 118.0 | 543      | 12.5      | 30 | 38 | 32 | Clay loam       | 1.09 | 0.11 | 7.7 | 1.50 | Wheat    | Cereals    | 180-270 | 240 | 3 | 220     | 3.2     |
| Tan et al. (2017)    | 37.0 | 118.0 | 543      | 12.5      | -  | 38 | -  | Clay loam       | 1.09 | 0.11 | 7.7 | 1.50 | Wheat    | Cereals    | 180-270 | 288 | 3 | 170     | 3.2     |
| Tan et al. (2017)    | 37.0 | 118.0 | 543      | 12.5      | -  | 38 | -  | Clay loam       | 1.09 | 0.11 | 7.7 | 1.50 | Wheat    | Cereals    | 180-270 | 236 | 3 | 230     | 3.2     |
| Tan et al. (2017)    | 37.0 | 118.0 | 543      | 12.5      | -  | 38 | -  | Clay loam       | 1.09 | 0.11 | 7.7 | 1.50 | Maize    | Cereals    | 240-330 | 100 | 3 | 90      | 5.8     |
| Tan et al. (2017)    | 37.0 | 118.0 | 543      | 12.5      | -  | 38 | -  | Clay loam       | 1.09 | 0.11 | 7.7 | 1.50 | Maize    | Cereals    | 240-330 | 87  | 3 | 280     | 5.8     |
| Tan et al. (2017)    | 37.0 | 118.0 | 543      | 12.5      | -  | 38 | -  | Clay loam       | 1.09 | 0.11 | 7.7 | 1.50 | Maize    | Cereals    | 240-330 | 104 | 3 | 330     | 5.8     |
| Tan et al. (2018)    | 45.0 | 124.7 | -        | -         | -  | 47 | -  | -               | 0.43 | 0.10 | 9.7 | 1.32 | Rice     | Rice       | 150     | 129 | 3 | 180     | -       |
| Tan et al. (2018)    | 45.0 | 124.7 | -        | -         | -  | 47 | -  | -               | 0.43 | 0.10 | 9.7 | 1.32 | Rice     | Rice       | 150     | 129 | 3 | 220     | -       |
| Wang et al. (2013)   | 31.6 | 120.7 | 1178     | 16.6      | 7  | 24 | 43 | Loam clay       | 1.13 | 0.20 | 7.4 | 1.26 | Rice     | Rice       | 126-180 | 120 | 3 | 180     | 6.1     |
| Yi et al. (2018)     | 32.7 | 119.7 | 451-462  | -         | -  | 21 | -  | Sandy loam      | 2.24 | 0.10 | 7.8 | 1.41 | Wheat    | Cereals    | 189-270 | 213 | 3 | 620     | 3.9-4.3 |
| Zhang et al. (2014)a | 29.9 | 115.1 | 1360     | 16.8      | -  | 24 | -  | Clay loam       | 1.79 | 0.22 | 6.6 | 1.26 | Rice     | Rice       | 210     | 133 | 3 | 550     | 7.7     |
| Zhang et al. (2015)  | 29.9 | 115.6 | 1361     | 17.8      | -  | 21 | -  | Sandy loam      | 1.69 | 0.22 | 5.8 | 1.41 | Rice     | Rice       | 180     | 137 | 3 | 2040    | 8.7     |
| Zhang et al. (2015)  | 29.9 | 115.6 | 1361     | 17.8      | -  | 21 | -  | Sandy loam      | 1.69 | 0.22 | 5.8 | 1.41 | Wheat    | Cereals    | 144     | 137 | 3 | 1670    | 5.7     |
| Zhang et al. (2009)  | 31.3 | 120.4 | 1038     | 15.5      | -  | 10 | -  | -               | 1.61 | 0.18 | 7.1 | 1.43 | Rice     | Rice       | 100-300 | 213 | 3 | 270     | 7.5     |
| Zhang et al. (2009)  | 31.3 | 120.4 | 1038     | 15.5      | -  | 10 | -  | -               | 1.61 | 0.18 | 7.1 | 1.43 | Wheat    | Cereals    | 100-250 | 117 | 3 | 130     | 4.5     |
| Zhou et al. (2014)   | 30.3 | 105.5 | 826      | 17.3      | 36 | 12 | -  | Silt loam       | 0.97 | 0.12 | 8.0 | 1.12 | Rice     | Rice       | 150-180 | 185 | 3 | 740     | 0.5     |
| Zhou et al. (2014)   | 30.3 | 105.5 | 826      | 17.3      | 36 | 12 | -  | Silt loam       | 0.97 | 0.12 | 8.0 | 1.12 | Wheat    | Cereals    | 150-180 | 204 | 3 | 390     | 0.5     |
| Zhou et al. (2014)   | 30.3 | 105.5 | 826      | 17.3      | 36 | 12 | -  | Silt loam       | 0.97 | 0.12 | 8.0 | 1.12 | Rapeseed | Vegetables | 150-180 | 175 | 3 | 110     | 0.5     |
| Zou et al. (2005)    | 31.9 | 118.8 | 1100     | 20.0      | 4  | 51 | 45 | Silty clay      | 1.31 | 0.11 | 6.7 | 1.28 | Rice     | Rice       | 150-450 | 117 | 3 | 1380    | -       |
| Zou et al. (2005)    | 31.9 | 118.8 | 1100     | 20.0      | 4  | 51 | 45 | Silty clay      | 1.31 | 0.11 | 6.7 | 1.28 | Rice     | Rice       | 150-450 | 117 | 3 | 1380    | -       |
| Zou et al. (2005)    | 31.9 | 118.8 | 1100     | 20.0      | 4  | 51 | 45 | Silty clay      | 1.31 | 0.11 | 6.7 | 1.28 | Wheat    | Cereals    | 100-300 | 207 | 3 | 2840    | -       |
| Zou et al. (2005)    | 31.9 | 118.8 | 1100     | 20.0      | 4  | 51 | 45 | Silty clay      | 1.31 | 0.11 | 6.7 | 1.28 | Wheat    | Cereals    | 100-300 | 207 | 3 | 2840    | -       |
| Zou et al. (2003)    | 31.8 | 118.9 | 1100     | 20.0      | -  | 49 | -  | Silty clay      | 1.75 | 0.11 | 6.7 | 1.28 | Rice     | Rice       | -       | 122 | 2 | 960     | -       |
| Zhou et al. (2017)   | 30.3 | 105.5 | 826      | 17.3      | -  | 12 | -  | Silt loam       | 0.97 | -    | 8.4 | 1.12 | Rice     | Rice       | -       | 123 | 3 | 510     | -       |
| Zhou et al. (2017)   | 30.3 | 105.5 | 826      | 17.3      | -  | 12 | -  | Silt loam       | 0.97 | -    | 8.4 | 1.12 | Rice     | Rice       | -       | 123 | 3 | 320     | -       |

|                      |      |       |     |      |   |    |   |           |      |   |     |      |            |            |   |     |   |       |   |
|----------------------|------|-------|-----|------|---|----|---|-----------|------|---|-----|------|------------|------------|---|-----|---|-------|---|
| Zhou et al. (2017)   | 30.3 | 105.5 | 826 | 17.3 | - | 12 | - | Silt loam | 0.97 | - | 8.4 | 1.12 | Rice       | Rice       | - | 123 | 3 | 330   | - |
| Zhou et al. (2017)   | 30.3 | 105.5 | 826 | 17.3 | - | 12 | - | Silt loam | 0.97 | - | 8.0 | 1.12 | Wheat      | Cereals    | - | 181 | 3 | 1330  | - |
| Zhou et al. (2017)   | 30.3 | 105.5 | 826 | 17.3 | - | 12 | - | Silt loam | 0.97 | - | 8.0 | 1.12 | Wheat      | Cereals    | - | 181 | 3 | 420   | - |
| Zhou et al. (2017)   | 30.3 | 105.5 | 826 | 17.3 | - | 12 | - | Silt loam | 0.97 | - | 8.0 | 1.12 | Wheat      | Cereals    | - | 182 | 3 | 240   | - |
| Zhou et al. (2015)   | 30.3 | 105.5 | 826 | 17.3 | - | 13 | - | Silt loam | 0.99 | - | 8.3 | 1.12 | Rice       | Rice       | - | 111 | 3 | 400   | - |
| Zhou et al. (2015)   | 30.3 | 105.5 | 826 | 17.3 | - | 13 | - | Silt loam | 0.99 | - | 8.3 | 1.12 | Rice       | Rice       | - | 111 | 3 | 30    | - |
| Zhou et al. (2015)   | 30.3 | 105.5 | 826 | 17.3 | - | 13 | - | Silt loam | 0.99 | - | 8.3 | 1.12 | Rice       | Rice       | - | 111 | 3 | 200   | - |
| Zhou et al. (2015)   | 30.3 | 105.5 | 826 | 17.3 | - | 13 | - | Silt loam | 0.86 | - | 8.3 | 1.12 | Rapeseed   | Vegetables | - | 181 | 3 | 840   | - |
| Zhou et al. (2015)   | 30.3 | 105.5 | 826 | 17.3 | - | 13 | - | Silt loam | 0.86 | - | 8.3 | 1.12 | Rapeseed   | Vegetables | - | 181 | 3 | 400   | - |
| Zhou et al. (2015)   | 30.3 | 105.5 | 826 | 17.3 | - | 13 | - | Silt loam | 0.86 | - | 8.3 | 1.12 | Rapeseed   | Vegetables | - | 182 | 3 | 100   | - |
| Zhang et al. (2014)b | 32.0 | 122.0 | -   | -    | - | 17 | - | -         | 1.57 | - | 7.9 | 1.40 | Rice       | Rice       | - | 154 | 3 | 79.2  | - |
| Zhang et al. (2012)  | 39.2 | 115.3 | -   | -    | - | 21 | - | -         | 0.89 | - | 8.2 | 1.41 | Maize      | Cereals    | - | 105 | 3 | 902   | - |
| Zhang et al. (2012)  | 39.2 | 115.3 | -   | -    | - | 21 | - | -         | 0.89 | - | 8.2 | 1.41 | Maize      | Cereals    | - | 115 | 2 | 850   | - |
| Zhang et al. (2013)  | 35.2 | 113.8 | -   | -    | - | 47 | - | -         | 0.97 | - | 8.3 | 1.39 | Wheat      | Cereals    | - | 249 | 3 | 290   | - |
| Yang et al. (2007)   | 41.8 | 123.6 | -   | -    | - | 22 | - | -         | 0.74 | - | 6.5 | 1.43 | Maize      | Cereals    | - | 188 | 3 | 10    | - |
| Xiang et al. (2015)  | 31.4 | 120.4 | -   | -    | - | 21 | - | -         | 1.14 | - | 6.0 | 1.20 | Wheat      | Cereals    | - | 186 | 3 | 540   | - |
| Xiang et al. (2007)  | 31.3 | 105.5 | -   | -    | - | 21 | - | -         | 0.48 | - | 8.3 | 1.37 | Maize      | Cereals    | - | 112 | 3 | 820   | - |
| Xia et al. (2014)    | 31.6 | 120.7 | -   | -    | - | 24 | - | -         | 1.97 | - | 8.1 | 1.26 | Rice       | Rice       | - | 125 | 3 | 780   | - |
| Xia et al. (2014)    | 31.6 | 120.7 | -   | -    | - | 24 | - | -         | 1.97 | - | 8.1 | 1.26 | Rice       | Rice       | - | 133 | 3 | 120   | - |
| Xia et al. (2014)    | 31.6 | 120.7 | -   | -    | - | 24 | - | -         | 1.97 | - | 8.1 | 1.26 | Wheat      | Cereals    | - | 205 | 3 | 260   | - |
| Xia et al. (2014)    | 31.6 | 120.7 | -   | -    | - | 24 | - | -         | 1.97 | - | 8.1 | 1.26 | Wheat      | Cereals    | - | 199 | 3 | 180   | - |
| Wang et al. (1994)   | 37.9 | 114.7 | -   | -    | - | 9  | - | -         | 0.63 | - | 8.5 | 1.44 | Maize      | Cereals    | - | 106 | 1 | 210   | - |
| Wang et al. (2006)   | 41.5 | 123.4 | -   | -    | - | 22 | - | -         | 1.40 | - | 6.7 | 1.37 | Wheat      | Cereals    | - | 76  | 3 | 510   | - |
| Wang et al. (2006)   | 41.5 | 123.4 | -   | -    | - | 22 | - | -         | 1.40 | - | 6.7 | 1.37 | Maize      | Cereals    | - | 161 | 3 | 700   | - |
| Wang et al. (2009)   | 31.5 | 120.7 | -   | -    | - | 24 | - | -         | 1.20 | - | 7.1 | 1.26 | Rice       | Cereals    | - | 120 | 3 | 90    | - |
| Wang et al. (2009)   | 31.5 | 120.7 | -   | -    | - | 24 | - | -         | 2.03 | - | 7.1 | 1.26 | Wheat      | Cereals    | - | 184 | 3 | 130   | - |
| Song et al. (1997)   | 37.9 | 114.7 | -   | -    | - | 30 | - | -         | 0.43 | - | 8.5 | 1.44 | Wheat      | Cereals    | - | 271 | 1 | 707.2 | - |
| Song et al. (1997)   | 37.9 | 114.7 | -   | -    | - | 30 | - | -         | 0.43 | - | 8.5 | 1.44 | Maize      | Cereals    | - | 121 | 1 | 322.8 | - |
| Pei et al. (2012)    | 38.1 | 115.3 | -   | -    | - | 18 | - | -         | 0.98 | - | 6.9 | 1.44 | Maize      | Cereals    | - | 115 | 3 | 400   | - |
| Pei et al. (2012)    | 38.1 | 115.3 | -   | -    | - | 9  | - | -         | 0.63 | - | 8.1 | 1.44 | Wheat      | Cereals    | - | 255 | 3 | 900   | - |
| Pei et al. (2012)    | 38.1 | 115.3 | -   | -    | - | 18 | - | -         | 0.98 | - | 6.9 | 1.44 | Maize      | Cereals    | - | 109 | 3 | 690   | - |
| Qin et al. (2006)    | 28.3 | 112.8 | -   | -    | - | 21 | - | -         | 1.12 | - | 6.6 | 1.41 | Rice       | Rice       | - | 88  | 3 | 100   | - |
| Qin et al. (2006)    | 28.3 | 112.8 | -   | -    | - | 21 | - | -         | 1.12 | - | 6.6 | 1.41 | Rice       | Rice       | - | 80  | 3 | 480   | - |
| Qiu et al. (2010)    | 30.5 | 114.4 | -   | -    | - | 44 | - | -         | 1.15 | - | 5.8 | 1.38 | Vegetables | Vegetables | - | 356 | 3 | 480   | - |
| Qiu et al. (2010)    | 30.5 | 114.4 | -   | -    | - | 44 | - | -         | 1.15 | - | 5.8 | 1.38 | Vegetables | Vegetables | - | 356 | 3 | 490   | - |
| Meng et al. (2012)   | 34.9 | 110.7 | -   | -    | - | 17 | - | -         | 1.05 | - | 8.7 | 1.36 | Maize      | Cereals    | - | 108 | 3 | 160   | - |
| Li et al. (2018)     | 34.3 | 108.1 | -   | -    | - | 14 | - | -         | 0.79 | - | 8.3 | 1.24 | Wheat      | Cereals    | - | 244 | 4 | 310   | - |
| Li et al. (2018)     | 34.3 | 108.1 | -   | -    | - | 14 | - | -         | 0.79 | - | 8.3 | 1.24 | Wheat      | Cereals    | - | 241 | 4 | 270   | - |
| Liang et al. (2004)  | 47.4 | 126.6 | -   | -    | - | 23 | - | -         | 1.37 | - | 7.0 | 1.30 | Rice       | Rice       | - | 125 | 3 | 200   | - |
| Liang et al. (2004)  | 47.4 | 126.6 | -   | -    | - | 23 | - | -         | 1.37 | - | 7.0 | 1.30 | Maize      | Cereals    | - | 161 | 3 | 900   | - |
| Liu et al. (2004)    | 40.0 | 116.3 | -   | -    | - | 9  | - | -         | 0.87 | - | 8.2 | 1.32 | Maize      | Cereals    | - | 49  | 4 | 120   | - |
| Liu et al. (2004)    | 40.0 | 116.3 | -   | -    | - | 9  | - | -         | 0.87 | - | 8.2 | 1.32 | Maize      | Cereals    | - | 49  | 4 | 120   | - |
| Iqbal et al. (2009)  | 30.5 | 120.4 | -   | -    | - | 20 | - | -         | 0.60 | - | 7.7 | 1.35 | Rice       | Rice       | - | 64  | 3 | 870   | - |
| Ji et al. (2010)     | 31.1 | 115.1 | -   | -    | - | 22 | - | -         | 1.12 | - | 8.6 | 1.43 | Wheat      | Cereals    | - | 234 | 3 | 130   | - |



|                     |      |       |      |      |    |    |    |                 |      |      |     |      |                |            |         |     |   |         |      |
|---------------------|------|-------|------|------|----|----|----|-----------------|------|------|-----|------|----------------|------------|---------|-----|---|---------|------|
| Huang et al. (2005) | 30.5 | 120.4 | -    | -    | -  | 20 | -  | -               | 1.08 | -    | 6.9 | 1.35 | Rice           | Rice       | -       | 122 | 3 | 360     | -    |
| Huang et al. (1998) | 41.5 | 122.4 | -    | -    | -  | 47 | -  | -               | 2.94 | -    | 6.3 | 1.27 | Maize          | Cereals    | -       | 230 | 3 | 300     | -    |
| Guo et al. (2012)   | 38.3 | 112.7 | -    | -    | -  | 21 | -  | -               | 0.44 | -    | 8.4 | 1.41 | Maize          | Cereals    | -       | 137 | 3 | 90      | -    |
| Dong et al. (2005)  | 37.0 | 116.6 | -    | -    | -  | 21 | -  | -               | 0.85 | -    | 8.5 | 1.41 | Maize          | Cereals    | -       | 110 | 3 | 2450    | -    |
| Dong et al. (2005)  | 37.0 | 116.6 | -    | -    | -  | 21 | -  | -               | 0.85 | -    | 8.5 | 1.41 | Maize          | Cereals    | -       | 110 | 3 | 2450    | -    |
| Dong et al. (2005)  | 30.5 | 120.4 | -    | -    | -  | 20 | -  | -               | 1.08 | -    | 6.9 | 1.35 | Rice           | Rice       | -       | 122 | 3 | 364.608 | -    |
| Chen et al. (2013)  | 30.8 | 121.4 | -    | -    | -  | 21 | -  | -               | 1.12 | -    | 7.8 | 1.41 | Rice           | Rice       | -       | 124 | 3 | 800     | -    |
| Chen et al. (2012)  | 39.3 | 116.0 | -    | -    | -  | 6  | -  | -               | 1.97 | -    | 8.0 | 1.40 | Vegetables     | Vegetables | -       | 102 | 3 | 1230    | -    |
| Chen et al. (2012)  | 39.3 | 116.0 | -    | -    | -  | 6  | -  | -               | 1.97 | -    | 8.0 | 1.40 | Vegetables     | Vegetables | -       | 105 | 3 | 3890    | -    |
| Li et al. (2021)    | 39.9 | 116.4 | 672  | 12.6 | 29 | 7  | 64 | Silt loam       | 1.27 | 0.11 | 8.1 | 1.52 | Cabbage        | Vegetables | 300     | 100 | 4 | 100     | 91.3 |
| Kong et al. (2021)  | 31.5 | 120.5 | 1063 | 18.0 | 43 | 19 | 39 | Loam            | 1.70 | 0.15 | 7.7 | 1.03 | Wheat          | Cereals    | 240     | 143 | 3 | 660     | 1.8  |
| Kong et al. (2021)  | 31.5 | 120.5 | 1063 | 18.0 | 43 | 19 | 39 | Loam            | 1.70 | 0.15 | 7.6 | 1.03 | Rice           | Rice       | 240     | 243 | 3 | 310     | 7.5  |
| Zhang et al. (2021) | 30.7 | 103.8 | 868  | 16.0 | 48 | 9  | 44 | Loam            | 3.00 | 0.18 | 7.4 | 1.23 | BJGL           | Vegetables | 100     | 130 | 3 | 1530    | -    |
| Zhang et al. (2021) | 30.7 | 103.8 | 868  | 16.0 | 48 | 9  | 44 | Loam            | 3.00 | 0.18 | 7.4 | 1.23 | Lettuce        | Vegetables | 100     | 45  | 3 | 1600    | -    |
| Zhang et al. (2021) | 30.7 | 103.8 | 868  | 16.0 | 48 | 9  | 44 | Loam            | 3.00 | 0.18 | 7.4 | 1.23 | Cabbage        | Vegetables | 100     | 85  | 3 | 780     | -    |
| Zhang et al. (2021) | 31.3 | 105.5 | 863  | 17.3 | 48 | 8  | 43 | Loam            | 2.80 | 0.13 | 8.4 | 1.21 | BJGL           | Vegetables | 90      | 109 | 3 | 570     | -    |
| Zhang et al. (2021) | 31.3 | 105.5 | 863  | 17.3 | 48 | 8  | 43 | Loam            | 2.80 | 0.13 | 8.4 | 1.21 | Lettuce        | Vegetables | 90      | 55  | 3 | 690     | -    |
| Zhang et al. (2021) | 31.3 | 105.5 | 863  | 17.3 | 48 | 8  | 43 | Loam            | 2.80 | 0.13 | 8.4 | 1.21 | Cabbage        | Vegetables | 90      | 60  | 3 | 760     | -    |
| Zhang et al. (2021) | 31.3 | 105.5 | 863  | 17.3 | 48 | 8  | 43 | Loam            | 2.80 | 0.13 | 8.4 | 1.21 | Chinese cabbag | Vegetables | 90      | 78  | 3 | 1380    | -    |
| Lv et al. (2021)    | 44.0 | 87.5  | 311  | 7.7  | 17 | 30 | 53 | Silty clay loam | 1.52 | 0.10 | 8.1 | -    | Maize          | Cereals    | 240-360 | 365 | 3 | 200     | 4.9  |
| Lv et al. (2021)    | 44.0 | 87.5  | 311  | 7.7  | 17 | 30 | 53 | Silty clay loam | 1.52 | 0.10 | 8.1 | -    | Wheat          | Cereals    | 240-360 | 365 | 3 | 700     | 2.5  |
| Liao et al. (2021)  | 35.0 | 114.4 | 266  | 20.0 | 68 | 16 | 16 | Sandy loam      | 7.75 | 0.78 | 8.1 | 1.47 | Maize          | Cereals    | 200     | 86  | 3 | 2060    | 10.5 |
| Lyu et al. (2021)   | 38.9 | 100.4 | 146  | 7.4  | 60 | 6  | 34 | Sandy loam      | 1.25 | 0.10 | 8.2 | 1.36 | Maize          | Cereals    | 450     | 365 | 4 | 331     | 7.0  |
| Lyu et al. (2019)   | 38.9 | 100.4 | 146  | 7.4  | -  | -  | -  | Sandy loam      | 2.27 | 0.10 | 8.6 | 1.38 | Spring wheat   | Cereals    | 180-280 | 365 | 4 | 420     | 3.6  |
| Liu et al. (2016)   | 37.9 | 114.7 | 457  | 12.6 | 54 | 12 | 34 | Sandy loam      | 1.51 | 0.11 | 8.1 | 1.27 | Wheat          | Cereals    | 240     | 365 | 3 | 800     | -    |
| Deng et al. (2019)  | 29.2 | 115.8 | 1561 | 17.5 | -  | -  | -  | -               | 1.10 | 0.12 | 4.5 | 1.42 | Vegetables     | Vegetables | 400     | 384 | 4 | 1000    | -    |
| Ning et al. (2019)  | 35.1 | 112.5 | 300  | 25.0 | 57 | 4  | 39 | Sandy loam      | 1.34 | 0.10 | 8.0 | 1.35 | Maize          | Cereals    | 150     | 92  | 3 | 800     | 11.3 |
| Ning et al. (2019)  | 35.1 | 112.5 | 300  | 25.0 | 57 | 4  | 39 | Sandy loam      | 1.34 | 0.10 | 8.0 | 1.35 | Maize          | Cereals    | 150     | 92  | 3 | 650     | 10.5 |
| Song et al. (2018)  | 36.8 | 115.0 | 473  | 13.2 | -  | -  | -  | -               | -    | -    | -   | -    | Maize          | Cereals    | 250     | 365 | 4 | 1100    | 6.7  |
| Liu et al. (2020)   | 35.0 | 114.4 | 615  | 13.9 | -  | -  | -  | -               | -    | -    | -   | -    | Maize/wheat    | Cereals    | 200     | 365 | 3 | 700     | -    |

## References

- Ahmad, S., Li, C., Dai, G., Zhan, M., Wang, J., Pan, S. & Cao, C. 2009. Greenhouse gas emission from direct seeding paddy field under different rice tillage systems in central China. *Soil and Tillage Research*, **106**, 54-61.
- Cai, Y., Ding, W. & Luo, J. 2012. Spatial variation of nitrous oxide emission between interrow soil and interrow plus row soil in a long-term maize cultivated sandy loam soil. *Geoderma*, **181-182**, 2-10.
- Cai, Y., Ding, W. & Luo, J. 2013. Nitrous oxide emissions from Chinese maize-wheat rotation systems: A 3-year field measurement. *Atmospheric Environment*, **65**, 112-122.
- Cai, Y., Wang, X., Tian, L., Zhao, H., Lu, X. & Yan, Y. 2014. The impact of excretal returns from yak and Tibetan sheep dung on nitrous oxide emissions in an alpine steppe on the Qinghai-Tibetan Plateau. *Soil Biology and Biochemistry*, **76**, 90-99.
- Cai, Z. C., Xing, G. X., Yan, X. Y., Xu, H., Tsuruta, H., Yagi, K. & Minami, K. 1997. Methane and nitrous oxide emissions from rice paddy fields as affected by nitrogen fertilisers and water management. *Plant and Soil*, **196**, 7-14.
- Chang-Ai, L. U., Kong, L. M., Wan-Li, H. U., Xia, T. Y. & Duan, Z. Y. 2008. N<sub>2</sub>O Emission from Intensive Celery Field of Dianchi Watershed. *Journal of Agro-Environment Science*.
- Chen, Z., Chen, Y.-y., Gao, J., Liu, R.-l., Yang, Z.-l. & Zhang, A.-p. 2015. Effects of different fertilization measures on N<sub>2</sub>O emission in oil sunflower field in irrigation area of upper Yellow River. *Ying yong sheng tai xue bao = The journal of applied ecology*, **26**, 129-139.
- Cheng, X. Y., Lan, Y., Liu, Z. Q., Liu, X. L., Miao, W., He, T. Y., Yang, X., Meng, J. & Chen, W. F. 2016. Effect of biochar on the greenhouse gas emissions from farmland and its physicochemical properties. In: *International Conference on Mechatronic, Manufacturing and Materials Engineering (MMME)*. Hong Kong, PEOPLES R CHINA.
- Cui, F., Yan, G., Zhou, Z., Zheng, X. & Deng, J. 2012. Annual emissions of nitrous oxide and nitric oxide from a wheat-maize cropping system on a silt loam calcareous soil in the North China Plain. *Soil Biology & Biochemistry*, **48**, 10-19.
- De-Feng, W., Jiang, J. S., Gao, B., Liu, Y., Wang, R., Wang, Z. Q., Dang, T. H., Guo, S. L. & Xiao-Tang, J. U. 2016. Effects of DCD addition on grain yield, N<sub>2</sub>O emission and residual nitrate-N of spring maize in rain-fed agriculture. *Journal of Plant Nutrition and Fertilizer*.
- Diao, T., Xie, L., Guo, L., Yan, H., Lin, M., Zhang, H., Lin, J. & Lin, E. 2013. Measurements of N<sub>2</sub>O emissions from different vegetable fields on the North China Plain. *Atmospheric Environment*, **72**, 70-76.
- Ding, W., Cai, Y., Cai, Z., Yagi, K. & Zheng, X. 2007. Nitrous oxide emissions from an intensively cultivated maize-wheat rotation soil in the North China Plain.

- Sci Total Environ*, **373**, 501–511.
- Ding, W., Luo, J., Li, J., Yu, H., Fan, J. & Liu, D. 2013. Effect of long-term compost and inorganic fertilizer application on background N<sub>2</sub>O and fertilizer-induced N<sub>2</sub>O emissions from an intensively cultivated soil. *Science of the Total Environment*, **465**, 115–124.
- Ding, W. X., Yu, H. Y. & Cai, Z. C. 2011. Impact of urease and nitrification inhibitors on nitrous oxide emissions from fluvo-aquic soil in the North China Plain. *Biology and Fertility of Soils*, **47**, 91–99.
- Fan, J. W., Bai, J., Ren, H. Y., Han, X. & Guo, L. P. 2016. Effects of reducing nitrogen and biochar application on CO<sub>2</sub> and N<sub>2</sub>O emissions from summer maize-winter wheat field in north China.
- Fu, Z. Q., Pan, L., Liu, Y. Y., Zhong, J. & Long, W. F. 2015. Effects of Water and Nitrogenous Fertilizer Coupling on CH<sub>4</sub> and N<sub>2</sub>O Emission from Double-Season Rice Paddy Field. *Huan jing ke xue= Huanjing kexue / [bian ji, Zhongguo ke xue yuan huan jing ke xue wei yuan hui "Huan jing ke xue" bian ji wei yuan hui. ]*, **36**, 3365–3372.
- Gang, Y. J., Fei, Z. P., Hui, N. X., Qiang, X., Bing, C., Yuan, Z. G., Cun, L. B. & MOA 2014. Effects of Controlled Release Fertilizer on Soil Nitrate Leaching, N<sub>2</sub>O Emission and Fruit Yield and Quality in Greenhouse Tomato Production System. *Journal of Agro-Environment Science*, **33**, 1849–1857.
- Gao, B., Ju, X., Fang, S., Meng, Q., Oenema, O., Christie, P., Chen, X. & Zhang, F. 2014. Nitrous oxide and methane emissions from optimized and alternative cereal cropping systems on the North China Plain: A two-year field study. *Science of the Total Environment*, **472**, 112–124.
- Guang-Zhao, D., Cheng-Fang, L. I., Cou-Gui, C., Ming, Z., Le-Ga, T., Shao-Hua, M., Zhong-Bing, Z. & Duan-Yang, F. 2009. Effects of no-tillage and fertilization on paddy soil CH<sub>4</sub> and N<sub>2</sub>O emissions and their greenhouse effect in Central China. *Ying yong sheng tai xue bao = The journal of applied ecology / Zhongguo sheng tai xue xue hui, Zhongguo ke xue yuan Shenyang ying yong sheng tai yan jiu suo zhu ban*, **20**, 2166–2172.
- Hai-yun, W. & Guang-xi, X. 2009. Effect of Nitrogen Fertilizer Rates on Nitrous Oxide Emission from Paddy Field Under Rice-Wheat Rotation. *Journal of Agro-Environment Science*, **28**, 2631–2636.
- Hao, X. Y., Gao, W., Wang, Y. J., Jin, J. Y., Huang, S. W., Tang, J. W. & Zhang, Z. Q. 2012. Effects of combined application of organic manure and chemical fertilizers on N<sub>2</sub>O emission from greenhouse vegetable soil. *Plant Nutrition and Fertilizer ence*.
- Hu, A., Sun, X. & Liu, Q. 2016. Effects of different rotation systems on greenhouse gas (CH<sub>4</sub> and N<sub>2</sub>O) emissions in the Taihu Lake region, China. *Chinese Journal of Applied Ecology*, **27**, 99–106.
- Hu, X.-K., Su, F., Ju, X.-T., Gao, B., Oenema, O., Christie, P., Huang, B.-X., Jiang, R.-F. & Zhang, F.-S. 2013. Greenhouse gas emissions from a wheat-maize double cropping system with different nitrogen fertilization regimes. *Environmental Pollution*, **176**, 198–207.

- Huang, H., Xiao, Q., Shen, Y. & Li, S. 2014. Effect of Biochar on Nitrous Oxide Emissions from Dryland Spring Corn Field on the Loess Plateau. *Journal of Agro-Environment Science*, **33**, 2063-2070.
- Huang, S. H., Jiang, W. W., Lu, J. & Cao, J. M. 2005. Influence of nitrogen and phosphorus fertilizers on N<sub>2</sub>O emissions in rice fields. *Zhongguo Huanjing Kexue/China Environmental Science*, **25**, 540-543.
- Ji, Y., Liu, G., Ma, J., Xu, H. & Yagi, K. 2012. Effect of controlled-release fertilizer on nitrous oxide emission from a winter wheat field. *Nutrient Cycling in Agroecosystems*, **94**, 111-122.
- Ji, Y., Liu, G., Ma, J., Zhang, G., Xu, H. & Yagi, K. 2013. Effect of controlled-release fertilizer on mitigation of N<sub>2</sub>O emission from paddy field in South China: a multi-year field observation. *Plant and Soil*, **371**, 473-486.
- Jiang, B., Yang, S., Ma, Y., He, F., Zuo, H., Fan, D. & Yang, X. 2014. Effects on emission of greenhouse gas by different tillage treatments to winter wheat in polder areas. *Journal of Anhui Agricultural University*, **41**, 241-247.
- Jiang, J., Hu, Z., Sun, W. & Huang, Y. 2010. Nitrous oxide emissions from Chinese cropland fertilized with a range of slow-release nitrogen compounds. *Agriculture, Ecosystems & Environment*, **135**, 216-225.
- Li, B., Zhang, M. & Xiong, Z. 2014a. Effects of nitrogen fertilizer and biochar on net global warming potential of intensively managed vegetable fields. *China Sciencepaper*.
- Li, L. J., Han, X. Z., You, M. Y. & Horwath, W. R. 2013. Nitrous oxide emissions from Mollisols as affected by long-term applications of organic amendments and chemical fertilizers. *Sci Total Environ*, **452-453**, 302-308.
- Li, N., Ning, T., Cui, Z., Tian, S., Li, Z. & Lal, R. 2015a. N<sub>2</sub>O emissions and yield in maize field fertilized with polymer-coated urea under subsoiling or rotary tillage. *Nutrient Cycling in Agroecosystems*, **102**, 397-410.
- Li, Y., Wu, X., Guo, W. & Xue, X. 2014b. Characteristics of greenhouse soil N<sub>2</sub>O emissions in cucumber-tomato rotation system under different nitrogen conditions. *Transactions of the Chinese Society of Agricultural Engineering*, **30**, 260-267.
- Li, Y. K., Li, B., Guo, W. Z. & Wu, X. P. 2015b. Effects of Nitrogen Application on Soil Nitrification and Denitrification Rates and N<sub>2</sub>O Emissions in Greenhouse. *Journal of Agricultural Science and Technology*, **17**, 519-530.
- Lin, L. I., Li-Feng, H. U., Chen, F., Xiao, X. P. & Yang, G. L. 2006. Effects of Different Long-Term Fertilization on Emission of CH<sub>4</sub> and N<sub>2</sub>O from Paddy Soil. *Journal of Agro-Environment Science*.
- Lin, S., Iqbal, J., Hu, R., Wu, J., Zhao, J., Ruan, L. & Malghani, S. 2011. Nitrous oxide emissions from rape field as affected by nitrogen fertilizer management: A case study in Central China. *Atmospheric Environment*, **45**, 1775-1779.
- Liu, C., Wang, K. & Zheng, X. 2012a. Responses of N<sub>2</sub>O and CH<sub>4</sub> fluxes to fertilizer nitrogen addition rates in an irrigated wheat-maize cropping system in northern China. *Biogeosciences*, **9**, 839-850.
- Liu, C., Yao, Z., Wang, K. & Zheng, X. 2014a. Three-year measurements of nitrous

- oxide emissions from cotton and wheat-maize rotational cropping systems. *Atmospheric Environment*, **96**, 201-208.
- Liu, H., Liu, G., Li, Y., Wu, X., Liu, D., Dai, X., Xu, M. & Yang, F. 2016a. Effects of land use conversion and fertilization on CH<sub>4</sub> and N<sub>2</sub>O fluxes from typical hilly red soil. *Environmental Science and Pollution Research*, **23**, 20269-20280.
- Liu, H. Y., Hua, L. M. & Zhang, X. 2013a. Effect of Different N Application Methods on Yield, N<sub>2</sub>O Emission of Maize. *Journal of Agricultural Resources and Environment*.
- Liu, J., Zhu, L., Luo, S., Bu, L., Chen, X., Yue, S. & Li, S. 2014b. Response of nitrous oxide emission to soil mulching and nitrogen fertilization in semi-arid farmland. *Agriculture, Ecosystems & Environment*, **188**, 20-28.
- Liu, S., Qin, Y., Zou, J. & Liu, Q. 2010. Effects of water regime during rice-growing season on annual direct N<sub>2</sub>O emission in a paddy rice-winter wheat rotation system in southeast China. *Sci Total Environ*, **408**, 906-913.
- Liu, X.-y., Qu, J.-j., Li, L.-q., Zhang, A. f., Zheng, J., Zheng, J.-w. & Pan, G.-x. 2012b. Can biochar amendment be an ecological engineering technology to depress N<sub>2</sub>O emission in rice paddies?—A cross site field experiment from South China. *Ecological Engineering*, **42**, 168-173.
- Liu, X., Dong, Y., Qi, Y., Peng, Q., He, Y., Sun, L., Jia, J., Guo, S., Cao, C., Yan, Z. & Liu, X. 2015a. Response of N<sub>2</sub>O emission to water and nitrogen addition in temperate typical steppe soil in Inner Mongolia, China. *Soil and Tillage Research*, **151**, 9-17.
- Liu, Y.-n., Li, Y.-c., Peng, Z.-p., Wang, Y.-q., Ma, S.-y., Guo, L.-p., Lin, E.-d. & Han, X. 2015b. Effects of different nitrogen fertilizer management practices on wheat yields and N<sub>2</sub>O emissions from wheat fields in North China. *Journal of Integrative Agriculture*, **14**, 1184-1191.
- Liu, Y.-x., Wang, Y.-f., Lu, H.-h., Chen, Y., Tang, X., Wu, C.-y., Zhong, Z.-k. & Yang, S.-m. 2013b. Effects of biochar application on greenhouse gas emission from paddy soil and its physical and chemical properties. *Ying yong sheng tai xue bao = The journal of applied ecology*, **24**, 2166-2172.
- Liu, Y., Liu, W. & Zhu, B. 2016b. Effect of Fertilization Regime on Soil N<sub>2</sub>O Emission from Upland Field under Wheat-Maize Rotation System. *Acta Pedologica Sinica*, **53**, 735-745.
- Liu, Y. T., Li, Y. E., Wan, Y. F., Chen, D. L., Gao, Q. Z., Li, Y. & Qin, X. B. 2011. Nitrous oxide emissions from irrigated and fertilized spring maize in semi-arid northern China. *Agriculture Ecosystems & Environment*, **141**, 287-295.
- Ma, Y., Sun, L., Zhang, X., Yang, B., Wang, J., Yin, B., Yan, X. & Xiong, Z. 2013. Mitigation of nitrous oxide emissions from paddy soil under conventional and no-till practices using nitrification inhibitors during the winter wheat-growing season. *Biology and Fertility of Soils*, **49**, 627-635.
- Meng, L., Ding, W. X. & Cai, Z. C. 2005. Long-term application of organic manure and nitrogen fertilizer on N<sub>2</sub>O emissions, soil quality and crop production in a sandy loam soil. *Soil Biology & Biochemistry*, **37**, 2037-2045.
- Mu, Z. J., Huang, A. Y., Ni, J. P., Li, J. Q., Liu, Y. Y., Shi, S., Xie, D. T. &

- Hatano, R. 2013. Soil greenhouse gas fluxes and net global warming potential from intensively cultivated vegetable fields in southwestern China. *Journal of Soil Science and Plant Nutrition*, **13**, 566-578.
- Ni, K., Ding, W., Zaman, M., Cai, Z., Wang, Y., Zhang, X. & Zhou, B. 2012. Nitrous oxide emissions from a rainfed-cultivated black soil in Northeast China: effect of fertilization and maize crop. *Biology and Fertility of Soils*, **48**, 973-979.
- Qiao, Y., Miao, S., Han, X., You, M., Zhu, X. & Horwath, W. R. 2014. The effect of fertilizer practices on N balance and global warming potential of maize-soybean-wheat rotations in Northeastern China. *Field Crops Research*, **161**, 98-106.
- Qin, X., Li, Y., Liu, K. & Wan, Y. 2006. Methane and nitrous oxide emission from paddy field under different fertilization treatments. *Transactions of the Chinese Society of Agricultural Engineering*, **22**, 143-148.
- Rui, T., Zhang, Q., Rui, L., Tao, L., Chu, G. & University, S. 2015. Response of Soil N<sub>2</sub>O Emission to Partial Chemical Fertilizer Substituted by Organic Fertilizer in Mulch-drip Irrigated Cotton Field. *Transactions of the Chinese Society for Agricultural Machinery*.
- Shi, Y.-F., Wu, W.-L., Meng, F.-Q., Zheng, L., Wang, D.-P., Ye, H. & Ding, G.-W. 2014. Nitrous Oxide and Methane Fluxes During the Maize Season Under Optimized Management in Intensive Farming Systems of the North China Plain. *Pedosphere*, **24**, 487-497.
- Shi, Y., Wu, W., Meng, F., Zhang, Z., Zheng, L. & Wang, D. 2013. Integrated management practices significantly affect N<sub>2</sub>O emissions and wheat-maize production at field scale in the North China Plain. *Nutrient Cycling in Agroecosystems*, **95**, 203-218.
- Sun, X. X., Li, D. P., Wu, Z. J., Cui, Y. L., Han, M., Li, Y. H., Yang, D. F. & Cui, Y. K. 2016. Characteristics of ammonia volatilization and nitrous oxide emission from a paddy soil under continuous application of different slow/controlled release urea. *Ying yong sheng tai xue bao = The journal of applied ecology*, **27**, 1901-1909.
- Tang, H. M., Xiao, X. P., Wang, K., Li, W. Y., Liu, J. & Sun, J. M. 2016. Methane and nitrous oxide emissions as affected by long-term fertilizer management from double-cropping paddy fields in Southern China. *Journal of Agricultural Science*, **154**, 1378-1391.
- Wang, J., Chen, Z., Ma, Y., Sun, L., Xiong, Z., Huang, Q. & Sheng, Q. 2013. Methane and nitrous oxide emissions as affected by organic-inorganic mixed fertilizer from a rice paddy in southeast China. *Journal of Soils and Sediments*, **13**, 1408-1417.
- Wang, J. Y., Jia, J. X., Xiong, Z. Q., Khalil, M. A. K. & Xing, G. X. 2011. Water regime-nitrogen fertilizer-straw incorporation interaction: Field study on nitrous oxide emissions from a rice agroecosystem in Nanjing, China. *Agriculture Ecosystems & Environment*, **141**, 437-446.
- Wang, X., Zhang, R., Cai, L., Stephen, Y., Luo, Z., Li, L. & Xie, H. 2015. Emission

- characteristics of  $\text{CH}_4$  and  $\text{N}_2\text{O}$  fluxes from dryland field under different nitrogen treatments. *Acta Scientiae Circumstantiae*, **35**, 3655-3661.
- Wang, Y., Hu, C., Zhu, B., Xiang, H. & He, X. 2010. Effects of wheat straw application on methane and nitrous oxide emissions from purplish paddy fields. *Plant Soil and Environment*, **56**, 16-22.
- Wang, Y. C., Wang, L. Y., Gao, Z. L. & Wen-Qi, M. A. 2016. Effects of applying organic manure and chemical fertilizers on  $\text{N}_2\text{O}$  emissions from tomato greenhouse soil. *Journal of Agricultural University of Hebei*.
- Wei, Liu, Saddam, Hussain, Lishu, Wu, Ziguo, Qin, Xiaokun & Li 2016a. Greenhouse gas emissions, soil quality, and crop productivity from a mono-rice cultivation system as influenced by fallow season straw management. *Environmental Science & Pollution Research*.
- Wei, S. S., Wang, Y. Q., Li, Y. C., Shu, X. X., Peng, Z. P., Shi, X. L. & Zhou, Y. P. 2016b. Effects of nitrapyrin-nitrogen (N) fertilizer application rates on N utilization and  $\text{N}_2\text{O}$  emission in summer maize field. *Ying yong sheng tai xue bao = The journal of applied ecology*, **27**, 1163-1168.
- Wu, W.-M., Yang, G. M. & SHALi-qing 2008. Impact of Nitrogen Fertilizer on  $\text{N}_2\text{O}$  Flux from a Paddy Soil in Xishuangbanna, Southwest China. *Journal of Agro-Environment Science*.
- Xiang, H., Zhu, B., Kuang, F., Li, T., Wang, Y. & Zheng, X. 2007. Effects of nitrogen fertilizer application on  $\text{N}_2\text{O}$  emission in a purple soil and maize root system. *Acta Scientiae Circumstantiae*, **27**, 8.
- Xiang, J., Liu, D., Ding, W., Yuan, J. & Lin, Y. 2015. Effects of biochar on nitrous oxide and nitric oxide emissions from paddy field during the wheat growth season. *Journal of Cleaner Production*, **104**, 52-58.
- Xie, Y., Rong, X. M., Zhang, Y. P., Xin, H. E., Shi, D. J. & Liu, Q. 2016. Effects of reduced CRNF applications on  $\text{N}_2\text{O}$  emissions and ammonia volatilization in spring maize soil. *Journal of Agro-Environment Science*.
- Xiong, Z. Q., Xing, G. X., He, T., Shi, S. L. & Qian, W. 2002a. The effects of summer legume crop cultivation on nitrous oxide emissions from upland farmland. *Scientia Agricultura Sinica*.
- Xiong, Z. Q., Xing, G. X., Tsuruta, H., Shen, G. Y., Shi, S. L. & Du, L. J. 2002b. Measurement of nitrous oxide emissions from two rice-based cropping systems in China. *Nutrient Cycling in Agroecosystems*, **64**, 125-133.
- Yan, G., Yao, Z., Zheng, X. & Liu, C. 2015. Characteristics of annual nitrous and nitric oxide emissions from major cereal crops in the North China Plain under alternative fertilizer management. *Agriculture, Ecosystems & Environment*, **207**, 67-78.
- Yan, G., Zheng, X., Cui, F., Yao, Z., Zhou, Z., Deng, J. & Xu, Y. 2013. Two-year simultaneous records of  $\text{N}_2\text{O}$  and  $\text{NO}$  fluxes from a farmed cropland in the northern China plain with a reduced nitrogen addition rate by one-third. *Agriculture, Ecosystems & Environment*, **178**, 39-50.
- Yan, H., Xie, L., Guo, L., Fan, J., Diao, T., Lin, M., Zhang, H. & Lin, E. 2014. Characteristics of nitrous oxide emissions and the affecting factors from

- vegetable fields on the North China Plain. *J Environ Manage*, **144**, 316–321.
- Yang, L., Wang, L.-g., Li, H., Qiu, J.-j. & Liu, H.-y. 2014. Impacts of Fertilization Alternatives and Crop Straw Incorporation on N<sub>2</sub>O Emissions from a Spring Maize Field in Northeastern China. *Journal of Integrative Agriculture*, **13**, 881–892.
- Yang, Y., Sun, Q. P., Ji-Jin, L. I., Liu, C. S., Liu, B. S., Jun-Xiang, X. U. & Gao, L. J. 2013. Effects of different fertilizer and irrigation levels on N<sub>2</sub>O emission from greenhouse vegetable lands. *Plant Nutrition and Fertilizer Science*, **19**, 430–436.
- Yang, Y., Sun, Q. P., Zou, G. Y., Jun-Xiang, X. U., Ji-Jin, L. I., Liu, C. S. & Jiang, L. H. 2016a. Effects of Reducing Irrigation and Organic Fertilization on N<sub>2</sub>O Emissions from Celery Field in Facilities. *Chinese Journal of Agrometeorology*.
- Yang, Y. Y., Gao, Z. L. & Wang, X. J. 2016b. Impacts of organic and inorganic fertilizations on alfalfa yield, soil nitrate and greenhouse gas emissions. *Ying yong sheng tai xue bao = The journal of applied ecology*, **27**, 822–828.
- Yao, Z., Du, Y., Tao, Y., Zheng, X., Liu, C., Lin, S. & Butterbach-Bahl, K. 2014. Water-saving ground cover rice production system reduces net greenhouse gas fluxes in an annual rice-based cropping system. *Biogeosciences*, **11**, 6221–6236.
- Yao, Z., Liu, C., Dong, H., Wang, R. & Zheng, X. 2015. Annual nitric and nitrous oxide fluxes from Chinese subtropical plastic greenhouse and conventional vegetable cultivations. *Environ Pollut*, **196**, 89–97.
- Yao, Z., Zheng, X., Dong, H., Wang, R., Mei, B. & Zhu, J. 2012. A 3-year record of N<sub>2</sub>O and CH<sub>4</sub> emissions from a sandy loam paddy during rice seasons as affected by different nitrogen application rates. *Agriculture, Ecosystems & Environment*, **152**, 1–9.
- Yao, Z., Zheng, X., Xie, B., Mei, B., Wang, R., Butterbach-Bahl, K., Zhu, J. & Yin, R. 2009. Tillage and crop residue management significantly affects N-trace gas emissions during the non-rice season of a subtropical rice-wheat rotation. *Soil Biology and Biochemistry*, **41**, 2131–2140.
- Zhai, Z., Wang, L., Li, H., Qiu, J., Yang, J. & Dong, X. 2013. Nitrous Oxide Emissions and Net Greenhouse Effect from Spring-maize Field as Influenced by Combined Application of Manure and Inorganic Fertilizer. *Journal of Agro-Environment Science*, **32**, 2502–2510.
- Zhang, A., Cui, L., Pan, G., Li, L., Hussain, Q., Zhang, X., Zheng, J. & Crowley, D. 2010a. Effect of biochar amendment on yield and methane and nitrous oxide emissions from a rice paddy from Tai Lake plain, China. *Agriculture, Ecosystems & Environment*, **139**, 469–475.
- Zhang, H., Zhang, Q. & Yang, Z. 2012a. Characteristics and factors of the N<sub>2</sub>O emission from the continuous cropping paddyfield in irrigation area of the Yellow River. *Acta Scientiae Circumstantiae*, **32**, 1902–1912.
- Zhang, J. & Han, X. 2008. N<sub>2</sub>O emission from the semi-arid ecosystem under mineral fertilizer (urea and superphosphate) and increased precipitation in northern China. *Atmospheric Environment*, **42**, 291–302.



- Zhang, J., Li, H., Wang, L. & Qiu, J. 2014a. Characteristics of nitrous oxide emissions from typical greenhouse vegetable fields in Beijing suburbs. *Acta Ecologica Sinica*, **34**, 4088–4098.
- Zhang, J., Xia, G.-L., Hu, L. I., Guo-Liang, Z., Xiao-Ling, M., Li-Gang, W., Cheng-Cheng, H. & Yu-Qian, J. 2016a. Effect of single basal fertilization on NO emissions in wheat and maize rotation system. *Journal of Agro-Environment Science*.
- Zhang, Y., Lin, F., Wang, X., Zou, J. & Liu, S. 2016b. Annual accounting of net greenhouse gas balance response to biochar addition in a coastal saline bioenergy cropping system in China. *Soil & Tillage Research*, **158**, 39–48.
- Zhang, Y., Liu, J., Mu, Y., Xu, Z., Pei, S., Lun, X. & Zhang, Y. 2012b. Nitrous oxide emissions from a maize field during two consecutive growing seasons in the North China Plain. *Journal of Environmental Sciences*, **24**, 160–168.
- Zhang, Y., Zheng, J., Zhou, W., Hu, Y., Wang, X., Shen, J. & Chen, L. 2014b. Effects of controlled release fertilizer on nitrous oxide emission during winter wheat-growing season under no-tillage condition. *Jiangsu Journal of Agricultural Sciences*, **30**, 1037–1043.
- Zhang, Z., Li, Y., Hua, L., Wan, Y. & Jiang, N. 2010b. Effects of different fertilizer levels on N<sub>2</sub>O flux from protected vegetable land. *Nongye Gongcheng Xuebao/Transactions of the Chinese Society of Agricultural Engineering*, **26**, 269–275.
- Zhang, Z., Zhu, B. & Xiang, H. 2010c. Effect of Nitrogen Fertilizer for Wheat on N<sub>2</sub>O Emission and Denitrification in Purple Soil. *Journal of Agro-Environment Science*, **29**, 8.
- Zhao, M., Tian, Y., Ma, Y., Zhang, M., Yao, Y., Xiong, Z., Yin, B. & Zhu, Z. 2015. Mitigating gaseous nitrogen emissions intensity from a Chinese rice cropping system through an improved management practice aimed to close the yield gap. *Agriculture Ecosystems & Environment*, **203**, 36–45.
- Zhao, X., Guo, L. P., Xie, L. Y., Sun, X., Zhao, H. L., Jing, X. U., Pan, S. M. & University, S. A. 2016. Impacts of Different Farming Managements on N<sub>2</sub>O Emission and Carbon Footprint for Maize from Brown Soil. *Chinese Journal of Agrometeorology*.
- Zhao, Z., Yue, Y., Zhang, Y., Lu, X. & Cao, L. 2014. Impact of Different Fertilization Practices on Greenhouse Gas Emission from Paddy Field. *Journal of Agro-Environment Science*, **33**, 2273–2278.
- Zhou, M., Zhu, B., Brueggemann, N., Bergmann, J., Wang, Y. & Butterbach-Bahl, K. 2014. N<sub>2</sub>O and CH<sub>4</sub> Emissions, and NO<sub>3</sub><sup>-</sup> Leaching on a Crop-Yield Basis from a Subtropical Rain-fed Wheat-Maize Rotation in Response to Different Types of Nitrogen Fertilizer. *Ecosystems*, **17**, 286–301.
- Zhou, M., Zhu, B., Brueggemann, N., Wang, X., Zheng, X. & Butterbach-Bahl, K. 2015. Nitrous oxide and methane emissions from a subtropical rice-rapeseed rotation system in China: A 3-year field case study. *Agriculture Ecosystems & Environment*, **212**, 297–309.
- Zhou, M., Zhu, B., Butterbach-Bahl, K., Zheng, X., Wang, T. & Wang, Y. 2013. Nitrous

- oxide emissions and nitrate leaching from a rain-fed wheat-maize rotation in the Sichuan Basin, China. *Plant and Soil*, **362**, 149-159.
- Zhou, Z., Xu, X., Bi, Z., Li, L., Li, B. & Xiong, Z. 2016. Soil concentration profiles and diffusion and emission of nitrous oxide influenced by the application of biochar in a rice-wheat annual rotation system. *Environmental Science and Pollution Research*, **23**, 7949-7961.
- Zhu, Y., Li, Y., Qin, X., Duan, Z., Wan, Y., Zhou, W., Wang, B. & He, J. 2016. Effects of controlled release fertilizer and nitrification inhibitor additions on nitrous oxide emissions from spring maize field in Northern China. *Journal of Agro-Environment Science*, **35**, 1421-1428.
- Zou, J., Huang, Y., Lu, Y., Zheng, X. & Wang, Y. 2005. Direct emission factor for NO from rice-winter wheat rotation systems in southeast China. *Atmospheric Environment*, **39**, 4755-4765.
