# Supplementary figures and images for: Impacts of crop type, management and soil quality indicators on background nitrous oxide emissions (BNE) from Chinese croplands: a quantitative review and analysis
Source: Royal Society of Chemistry journal article supplement (doi:10.1039/d2ea00033d), 2022-01-01

**Fig. S1:** Missing data pattern in the study

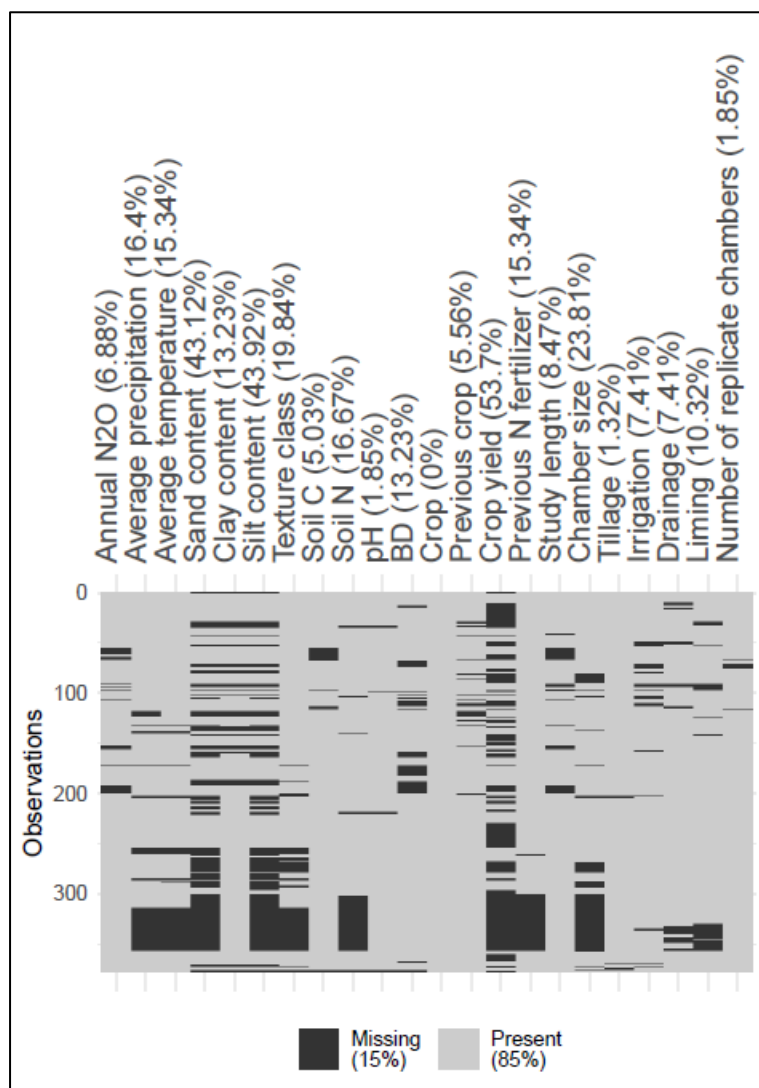

Supplement: d2ea00033d1.pdf [file d2ea00033d1.pdf]
